# Supplementary material
Source: Research Square preprint supplement (doi:10.21203/rs.3.rs-10183370/v1)
Supplement: Supplementary file 1 [file 9096aa78caee1f94e0382b9a.xlsx]

## Sheet: Table S1
Supplemental Table S1. Death-related signals in osimertinib therapy.
PT	primaryid	Death
Interstitial Lung Disease	172533363	151
Diarrhoea	172530421	63
Decreased Appetite	172693962	62
Pneumonia	137182233	57
Respiratory Failure	137363143	49
Dyspnoea	136690443	43
Pleural Effusion	136590863	38
Pneumonitis	172531151	37
Lung Disorder	136985683	37
Nausea	172731712	36
Pulmonary Embolism	136654511	34
Cardiac Failure	172693904	32
Asthenia	172731712	30
Rash	136694701	30
Pyrexia	136605302	27
Malaise	136690443	26
Anaemia	137282081	22
Vomiting	172842951	21
Fatigue	136694701	20
Thrombocytopenia	136605302	18
Dehydration	138758504	17
Hepatic Function Abnormal	172533363	16
Sepsis	136802941	16
Paronychia	172693904	15
Pneumonia Aspiration	141229155	15
Dysphagia	173553292	14
Cough	172687332	14
Disseminated Intravascular Coagulation	172677331	12
Cardiac Arrest	173327852	12
Pneumonia Bacterial	174527614	12
Pneumothorax	137030095	12
Deep Vein Thrombosis	172533363	12
Atrial Fibrillation	172818306	11
Constipation	172530421	11
Liver Disorder	138757953	11
Stomatitis	138423871	10
Cerebral Infarction	173299444	10
Cardiac Failure Congestive	173319874	9
Fall	140092422	9
Dry Skin	136694701	9
Cardio-Respiratory Arrest	144388315	8
Cardiac Failure Acute	174777993	8
Gait Disturbance	173022056	8
Oedema Peripheral	172687332	8
Urinary Tract Infection	137519852	8
Hyponatraemia	136985683	8
Cerebrovascular Accident	172478282	8
Loss Of Consciousness	176116381	8
Acute Kidney Injury	172689272	8
Acute Respiratory Failure	173958851	8
Acute Respiratory Distress Syndrome	175595001	8
Hypoxia	137630915	8
Pulmonary Toxicity	142555421	8
Thrombosis	172478282	8
Myocardial Infarction	173489141	7
Peripheral Swelling	172687332	7
Sudden Death	172836402	7
Infection	173155262	7
Headache	173327852	7
Altered State Of Consciousness	138973962	7
Depressed Level Of Consciousness	175681131	7
Renal Failure	173895361	7
Renal Impairment	136690443	7
Haemoptysis	121224935	7
Erythema	139283196	7
Hypotension	172847661	7
Cardiac Disorder	172967751	6
Multiple Organ Dysfunction Syndrome	126396067	6
Septic Shock	142210018	6
Back Pain	137519852	6
Coma	137231302	6
Somnolence	137519852	6
Dermatitis Acneiform	173563441	6
Pruritus	173022056	6
Thrombophlebitis Migrans	173299444	6
Pericardial Effusion	136590863	5
Ventricular Fibrillation	128576661	5
Cardiomyopathy	172721475	5
Cardiac Failure Chronic	121855313	5
Abdominal Discomfort	176621311	5
Intestinal Obstruction	139652122	5
Chest Pain	138079331	5
Pneumocystis Jirovecii Pneumonia	1390564110	5
Feeding Disorder	173327996	5
Myalgia	137108642	5
Dizziness	172842951	5
Seizure	139391831	5
Cognitive Disorder	139970011	5
Pulmonary Oedema	145264603	5

## Sheet: Table S2
Supplemental Table S2. System organ classes associated with death-related signals in osimertinib therapy.
SOC	PT (MedDRA) for osimertinib-related AE signals
Blood and lymphatic system	anaemia,thrombocytopenia,disseminated intravascular coagulation
Cardiac	cardiac failure, cardiac arrest, atrial fibrillation, cardiac failure, congestive cardio-respiratory arrest, cardiac failure acute, myocardial infarction, cardiac disorder, pericardial effusion, ventricular fibrillation, cardiomyopathy, cardiac failure chronic
Gastrointestinal	diarrhoea, nausea, vomiting, dysphagia, constipation, stomatitis, abdominal discomfort, intestinal obstruction
General	asthenia, pyrexia, malaise, fatigue, gait disturbance, oedema peripheral, peripheral swelling, sudden death, multiple organ dysfunction syndrome, chest pain
Hepatobiliary	hepatic function abnormal, liver disorder
Infections and infestations	pneumonia, sepsis, paronychia, pneumonia aspiration, pneumonia bacterial, urinary tract infection, infection, septic shock, pneumocystis jirovecii pneumonia
Injury, poisoning and procedural complications	fall
Metabolism and nutrition	decreased appetite, dehydration, hyponatraemia, feeding disorder
Musculoskeletal and connective tissue	back pain, myalgia
Nervous	cerebral infarction, cerebrovascular accident, loss of consciousness, headache, altered state of consciousness, depressed level of consciousness, coma, somnolence, dizziness, seizure, cognitive disorder
Renal and urinary	acute kidney injury, renal failure, renal impairment
Respiratory, thoracic and mediastinal	interstitial lung disease, respiratory failure, dyspnoea, pleural effusion, pneumonitis, lung disorder, pulmonary embolism, cough, pneumothorax, acute respiratory failure, acute respiratory distress syndrome, hypoxia, pulmonary toxicity, haemoptysis, pulmonary oedema
Skin and subcutaneous tissue	rash, dry skin, erythema, dermatitis acneiform, pruritus
Vascular	deep vein thrombosis, thrombosis, hypotension, thrombophlebitis migrans

## Sheet: Table S3
Supplemental Table S3. Logistic regression results for fatality-related AE signals occurring within 90 days after osimertinib initiation. Fatality-related AE signals were identified when Benjamini-Hochberg FDR-adjusted P values were below 0.05.
PT	With AE		Without AE			Demographic adjusted models						Demographic + time-to-onset+polypharmacy adjusted models
	Total	Death	Total	Death		OR	L_CI	U_CI	P	P_FDR		OR	L_CI	U_CI	P	P_FDR
Coma	2	2	1191	430		1571664	2.43644e-20	NA	0.97	0.97		1448983	2.22494e-20	NA	0.97	0.97
Multiple Organ Dysfunction Syndrome	2	2	1191	430		1276809	2.8976e-20	NA	0.97	0.97		1244156	2.31591e-20	NA	0.97	0.97
Cardiac Disorder	1	1	1192	431		591221	1.06706e-23	NA	0.97	0.97		403294	7.31691e-24	NA	0.97	0.97
Cardiac Arrest	6	5	1187	427		8.25	1.31	158.83	0.055	0.073		9.48	1.5	183.19	0.042	0.062
Respiratory Failure	26	21	1167	411		7.58	3.05	22.88	5.5789e-05	0.000223156		7.51	3.02	22.72	6.22216e-05	0.000373329
Pneumonia Aspiration	10	8	1183	424		6.79	1.68	45.33	0.016	0.032		7.12	1.76	47.57	0.013	0.027
Sepsis	9	7	1184	425		6.2	1.49	41.82	0.023	0.031		6.6	1.57	44.64	0.019	0.029
Cardiac Failure Acute	4	3	1189	429		5.46	0.69	110.86	0.14	0.19		5.35	0.68	108.67	0.15	0.22
Disseminated Intravascular Coagulation	12	9	1181	423		5.45	1.61	24.73	0.011	0.023		5.56	1.64	25.26	0.011	0.023
Depressed Level of Consciousness	4	3	1189	429		4.98	0.63	101.43	0.17	0.22		4.82	0.6	98.58	0.18	0.25
Cardiac Failure Chronic	3	2	1190	430		3.9	0.37	84.3	0.27	0.36		3.88	0.37	84.14	0.27	0.32
Thrombophlebitis Migrans	3	2	1190	430		3.68	0.35	79.79	0.29	0.39		3.52	0.33	76.07	0.31	0.36
Pneumocystis Jirovecii Pneumonia	6	4	1187	428		3.57	0.69	25.91	0.14	0.19		3.33	0.63	24.53	0.17	0.22
Hypotension	3	2	1190	430		3.23	0.31	70	0.34	0.45		3.8	0.36	82.54	0.28	0.33
Renal Failure	7	4	1186	428		2.2	0.48	11.26	0.31	0.41		2.11	0.46	10.83	0.33	0.4
Interstitial Lung Disease	167	83	1026	349		1.92	1.37	2.69	0.000128111	0.000512443		2.05	1.45	2.9	4.04092e-05	0.000242455
Acute Respiratory Distress Syndrome	8	4	1185	428		1.86	0.43	7.92	0.38	0.51		1.71	0.4	7.32	0.45	0.52
Pneumonia	40	20	1153	412		1.8	0.95	3.41	0.069	0.091		1.89	0.99	3.59	0.051	0.076
Somnolence	2	1	1191	431		1.74	0.068	44.31	0.7	0.7		1.34	0.052	34.43	0.84	0.84
Pneumonia Bacterial	10	5	1183	427		1.73	0.48	6.28	0.39	0.52		1.86	0.51	6.87	0.33	0.4
Loss of Consciousness	2	1	1191	431		1.69	0.066	43.28	0.71	0.71		1.51	0.059	38.62	0.77	0.77
Intestinal Obstruction	4	2	1189	430		1.67	0.2	14.03	0.61	0.61		1.84	0.22	15.57	0.55	0.55
Altered State of Consciousness	6	3	1187	429		1.63	0.3	8.95	0.55	0.59		1.62	0.29	8.94	0.56	0.56
Cognitive Disorder	4	2	1189	430		1.55	0.18	13.01	0.66	0.66		1.5	0.18	12.69	0.69	0.69
Urinary Tract Infection	9	4	1184	428		1.49	0.36	5.67	0.56	0.56		1.47	0.36	5.65	0.57	0.57
Cerebral Infarction	13	6	1180	426		1.46	0.47	4.45	0.5	0.56		1.51	0.48	4.61	0.47	0.54
Cardiac Failure	26	15	1157	417		1.34	0.67	2.63	0.4	0.53		1.35	0.67	2.66	0.39	0.47
Fall	12	5	1181	427		1.33	0.39	4.23	0.63	0.63		1.38	0.4	4.4	0.59	0.59
Lung Disorder	70	29	1123	403		1.28	0.77	2.08	0.33	0.44		1.3	0.78	2.12	0.3	0.36
Pneumonitis	24	10	1169	422		1.26	0.54	2.85	0.58	0.58		1.28	0.54	2.9	0.56	0.56
Nausea	42	17	1151	415		1.22	0.64	2.27	0.54	0.54		1.3	0.68	2.43	0.42	0.5
Cardio-Respiratory Arrest	5	2	1188	430		1.22	0.16	7.42	0.83	0.83		1.19	0.16	7.35	0.85	0.85
Pulmonary Toxicity	14	6	1179	426		1.21	0.39	3.54	0.72	0.72		1.11	0.36	3.25	0.85	0.85
Dehydration	25	10	1168	422		1.19	0.51	2.65	0.68	0.68		1.16	0.5	2.61	0.72	0.72
Hypoxia	10	4	1183	428		1.15	0.29	4.06	0.83	0.83		1.3	0.33	4.66	0.69	0.69
Feeding Disorder	5	2	1188	430		1.15	0.15	7	0.88	0.88		1.16	0.15	7.13	0.87	0.87
Atrial Fibrillation	26	10	1167	422		1.14	0.49	2.51	0.75	0.75		1.21	0.52	2.7	0.64	0.64
Acute Kidney Injury	8	3	1185	429		1.05804	0.21	4.35	0.94	0.94		1.12	0.23	4.63	0.87	0.87
Myalgia	8	3	1185	429		1.05	0.21	4.31	0.95	0.95		1.04	0.21	4.31	0.95	0.95
Pericardial Effusion	8	3	1185	429		1.04	0.21	4.28	0.96	0.96		1.16	0.23	4.81	0.84	0.84
Gait Disturbance	8	3	1185	429		1.04	0.21	4.28	0.96	0.96		1.06	0.21	4.36	0.94	0.94
Malaise	41	15	1152	417		1.01	0.51	1.9	0.99	0.99		1.05	0.53	1.99	0.88	0.88
Pulmonary Embolism	30	11	1163	421		1	0.45	2.1	1	1		1.07	0.48	2.24	0.87	0.87
Thrombocytopenia	27	10	1166	422		0.99	0.43	2.15	0.97	0.97		1.05	0.46	2.29	0.9	0.9
Abdominal Discomfort	3	1	1190	431		0.99	0.046	10.42	0.99	0.99		0.82	0.038	8.64	0.87	0.87
Dyspnoea	26	9	1167	423		0.95	0.4	2.11	0.91	0.91		0.96	0.4	2.13	0.92	0.92
Ventricular Fibrillation	3	1	1190	431		0.89	0.041	9.42	0.93	0.93		0.97	0.45	10.35	0.98	0.98
Myocardial Infarction	6	2	1187	430		0.89	0.12	4.58	0.89	0.89		0.92	0.13	4.81	0.93	0.93
Septic Shock	3	1	1190	431		0.88	0.041	9.31	0.92	0.92		0.92	0.042	9.61	0.94	0.94
Paronychia	28	9	1165	423		0.87	0.37	1.91	0.74	0.74		0.93	0.39	2.04	0.86	0.86
Constipation	12	4	1181	428		0.84	0.22	2.71	0.78	0.78		0.91	0.24	2.95	0.88	0.88
Haemoptysis	3	1	1190	431		0.81	0.037	8.56	0.86	0.86		0.98	0.045	10.43	0.99	0.99
Dysphagia	3	1	1190	431		0.81	0.037	8.58	0.87	0.87		0.73	0.033	7.98	0.8	0.8
Infection	7	2	1186	430		0.77	0.11	3.59	0.75	0.75		0.78	0.11	3.68	0.77	0.77
Anaemia	43	13	1150	419		0.76	0.38	1.43	0.41	0.54		0.77	0.39	1.48	0.46	0.54
Diarrhoea	102	30	1091	402		0.74	0.47	1.14	0.19	0.25		0.81	0.51	1.25	0.35	0.42
Vomiting	18	5	1175	427		0.73	0.23	1.95	0.55	0.57		0.74	0.23	1.98	0.57	0.57
Pyrexia	58	17	1135	415		0.72	0.39	1.26	0.26	0.35		0.78	0.42	1.38	0.42	0.5
Pruritus	14	4	1179	428		0.72	0.19	2.17	0.58	0.58		0.75	0.2	2.27	0.63	0.63
Headache	8	2	1185	430		0.67	0.098	2.95	0.63	0.63		0.72	0.1	3.18	0.69	0.69
Pleural Effusion	46	13	1147	419		0.67	0.34	1.26	0.23	0.31		0.67	0.34	1.28	0.24	0.29
Pneumothorax	21	6	1172	426		0.67	0.24	1.67	0.42	0.53		0.63	0.22	1.57	0.34	0.41
Cough	11	3	1182	429		0.63	0.14	2.21	0.5	0.59		0.66	0.14	2.33	0.55	0.56
Dry Skin	19	5	1174	427		0.63	0.2	1.66	0.38	0.5		0.65	0.21	1.74	0.42	0.51
Deep Vein Thrombosis	19	5	1174	427		0.63	0.2	1.66	0.38	0.5		0.62	0.2	1.65	0.37	0.45
Decreased Appetite	100	27	1093	405		0.62	0.38	0.97	0.044	0.058		0.64	0.39	1.01	0.06	0.09
Erythema	12	3	1181	429		0.6	0.13	2.03	0.45	0.54		0.63	0.14	2.13	0.49	0.52
Oedema Peripheral	15	4	1178	428		0.6	0.17	1.79	0.39	0.52		0.61	0.17	1.82	0.41	0.49
Rash	65	16	1128	416		0.59	0.32	1.02	0.07	0.093		0.63	0.34	1.11	0.12	0.19
Back Pain	4	1	1189	431		0.55	0.027	4.37	0.61	0.61		0.63	0.031	5.05	0.69	0.69
Cardiac Failure Congestive	18	4	1175	428		0.54	0.15	1.55	0.29	0.39		0.57	0.16	1.62	0.33	0.39
Hyponatraemia	13	3	1180	429		0.53	0.12	1.75	0.34	0.45		0.56	0.12	1.88	0.390511	0.468613
Renal Impairment	21	5	1172	427		0.52	0.17	1.33	0.2	0.27		0.54	0.17	1.39	0.23	0.28
Asthenia	14	3	1179	429		0.47	0.1	1.51	0.25	0.33		0.45	0.1	1.46	0.22	0.27
Dermatitis Acneiform	19	4	1174	428		0.46	0.13	1.28	0.17	0.23		0.52	0.15	1.45	0.25	0.29
Hepatic Function Abnormal	67	14	1126	418		0.44	0.23	0.79	0.00795124	0.016		0.44	0.24	0.8	0.00942432	0.028
Dizziness	10	2	1183	430		0.43	0.066	1.77	0.3	0.4		0.46	0.068	1.87	0.33	0.4
Stomatitis	33	6	1160	426		0.4	0.15	0.92	0.046	0.061		0.44	0.16	1.01	0.072	0.11
Chest Pain	5	1	1188	431		0.4	0.02	2.73	0.41	0.55		0.42	0.021	2.91	0.44	0.52
Liver Disorder	42	8	1151	424		0.39	0.16	0.81	0.017	0.027		0.41	0.17	0.86	0.027	0.041
Acute Respiratory Failure	6	1	1187	431		0.37	0.019	2.23	0.37	0.49		0.33	0.017	2.11	0.32	0.38
Cardiomyopathy	7	1	1186	431		0.33	0.017	1.95	0.31	0.41		0.31	0.016	1.86	0.28	0.34
Fatigue	9	1	1184	431		0.24	0.013	1.31	0.18	0.24		0.23	0.012	1.28	0.17	0.25
Cerebrovascular Accident	1	0	1192	432		6.74795e-06	NA	3.73812e+23	0.97	0.97		7.62946e-06	NA	4.22404e+23	0.97	0.97
Peripheral Swelling	1	0	1192	432		6.58148e-06	NA	3.64071e+23	0.97	0.97		6.20296e-06	NA	3.43078e+23	0.97	0.97
Thrombosis	2	0	1191	432		2.13777e-06	NA	9.76964e+19	0.97	0.97		1.74903e-06	NA	1.12765e+20	0.97	0.97
Seizure	3	0	1190	432		2.04225e-06	NA	529268800000	0.96	0.96		2.05295e-06	NA	365078600000	0.96	0.96
Pulmonary Oedema	8	0	1185	432		8.56404e-07	NA	239229	0.96	0.96		7.78429e-07	NA	130370	0.96	0.96

## Sheet: Table S4
Supplemental Table S4. XGBoost training dataset for early fatality risk stratification in osimertinib-associated adverse-event reports.
ILD	RF	SEP	PA	DIC	BPD	GENDER	AGE	rank_DRUGNAME	TIME	RESULT
0	0	0	0	0	0	2	67	1	28	0
0	0	0	0	0	0	1	60	3	2	0
0	0	0	0	0	0	2	76.8548	5	21	0
0	1	0	0	0	0	1	60.7945	5	9	1
1	0	0	0	0	0	2	62.6274	4	13	0
0	0	0	0	0	0	2	71.1425	1	15	1
0	0	0	0	0	0	1	53.2	1	25	1
0	0	0	0	0	0	2	66.6027	11	88	0
0	0	0	0	0	0	1	72.9699	3	12	0
0	0	0	0	0	0	2	72.2603	1	80	0
0	0	0	0	0	0	2	59	1	6	0
0	0	0	0	0	0	2	82.9507	4	50	0
0	0	0	0	0	0	2	57	3	49	0
1	0	0	0	0	0	1	63.0833	8	70	1
0	0	0	0	0	0	2	49	11	18	0
0	0	0	0	0	0	1	72.3205	20	13	0
0	0	0	0	0	0	1	57.3918	14	23	0
0	0	0	0	0	0	1	78	13	8	1
0	0	0	0	0	0	1	77.0438	7	61	1
0	0	0	0	0	0	2	46.8904	5	7	1
0	0	0	0	0	0	1	77	8	81	0
0	0	0	0	0	0	1	73	8	21	0
0	0	0	0	0	0	1	46	10	9	0
0	0	0	0	0	0	1	78.1667	1	76	0
0	0	0	0	0	0	1	73.8333	16	21	0
0	0	0	0	0	0	1	84.2575	1	34	0
0	0	0	0	0	0	1	76.474	14	16	0
0	0	0	0	0	0	1	67.0164	1	25	0
0	0	0	0	0	0	1	67.4301	3	19	1
0	0	0	0	0	0	1	79.3699	8	39	0
0	0	0	0	0	0	1	46	2	7	0
0	0	0	0	0	0	1	59	1	21	1
0	0	0	0	0	0	1	86.9753	1	10	0
0	0	0	0	0	0	1	44	16	4	1
0	0	0	0	0	0	1	80	2	4	0
0	0	0	0	0	0	1	77	1	21	0
0	0	0	0	0	0	1	71	1	23	1
0	0	0	0	0	0	1	75.9753	8	19	0
0	0	0	0	0	0	1	77	1	21	0
0	0	0	0	0	0	1	78	1	7	0
0	0	0	0	0	0	1	78.3589	7	52	0
0	0	0	0	0	0	2	59	2	7	0
1	1	0	0	0	0	2	68	5	7	1
1	0	0	0	0	0	1	71	13	34	0
0	0	0	0	0	0	1	69.1644	10	23	0
0	0	0	0	0	0	1	81	2	7	0
0	0	0	0	0	0	1	66	1	7	0
0	0	0	0	0	0	1	65	1	3	1
0	0	0	0	0	0	2	74	1	2	0
0	0	0	0	0	0	1	65	1	13	1
0	0	0	0	0	0	1	82.663	10	82	0
0	0	0	0	0	0	1	78	2	12	0
1	0	0	0	0	0	1	82	11	11	1
0	0	0	0	0	0	1	54	1	42	0
0	0	0	0	0	0	1	67	12	65	0
0	0	0	0	0	0	2	53	1	19	1
0	0	0	0	0	0	2	38	7	2	0
0	0	0	0	0	0	1	79	1	1	0
0	0	0	0	0	0	1	71.1808	4	74	0
0	0	0	0	0	0	2	69	1	15	0
0	0	0	0	0	0	1	47	6	14	0
0	0	0	0	0	0	2	65	1	1	0
0	0	0	0	0	0	2	78	1	21	0
0	0	0	0	0	0	1	81	1	29	0
0	0	0	1	0	0	1	71.726	7	54	1
0	0	0	0	0	0	1	60.2055	1	7	0
0	0	0	0	0	0	1	52	1	29	0
0	0	0	0	0	0	2	45.9167	12	17	0
1	1	0	0	0	0	1	58.8712	2	34	1
0	0	0	0	0	0	1	64	2	54	0
0	0	0	0	0	0	1	81	1	8	0
0	0	0	0	0	0	2	66	16	18	0
0	0	0	0	0	0	1	72	1	7	0
1	0	0	0	0	0	2	76	14	3	1
0	0	0	0	0	0	1	52	10	27	0
1	0	0	0	0	0	2	64	7	7	0
1	0	0	0	0	0	2	63	2	6	1
1	0	0	0	0	1	1	80	8	51	1
0	0	0	0	0	0	2	61	2	7	0
1	0	0	0	0	0	1	60	11	21	0
0	0	0	0	0	0	1	77	8	25	1
0	0	0	0	0	0	2	53.0521	6	7	0
1	0	0	0	0	0	1	63	5	35	1
0	0	0	0	0	0	1	75	9	71	0
0	0	0	0	0	0	1	52.3333	3	34	1
0	0	0	0	0	0	1	87	2	22	0
0	0	0	0	0	0	1	55	1	5	0
0	0	0	0	0	0	1	67.9014	5	8	0
0	0	0	0	0	0	2	65.6521	6	73	0
0	0	0	0	0	0	2	71	1	6	0
0	0	0	0	0	0	1	78	4	5	0
0	0	0	0	0	0	1	77	1	14	0
1	0	0	0	0	0	2	62	7	23	1
0	0	0	0	0	0	2	63	12	8	0
0	0	0	0	1	0	1	70	1	17	0
0	0	0	0	0	0	1	72	4	11	0
0	0	0	0	0	0	2	51.3333	2	62	0
1	0	0	0	0	0	1	82	11	20	0
0	0	0	0	0	0	1	62	2	40	1
0	0	0	0	0	0	2	75	7	17	1
0	0	1	0	0	0	2	58	3	6	1
1	0	0	0	0	0	1	62	7	70	0
1	0	0	0	0	0	1	57	4	44	0
0	0	0	0	0	0	1	81.5479	5	2	0
1	0	0	0	0	0	2	72	5	57	1
1	0	0	0	0	0	1	85	27	29	1
0	0	0	0	0	0	2	68	1	4	0
0	0	0	0	0	0	2	51.8411	18	10	1
0	0	0	0	0	0	1	82	9	21	0
0	0	0	0	0	0	1	79	18	18	0
0	0	0	0	0	0	1	63	1	76	0
0	0	0	0	0	0	2	80.6667	9	24	0
1	0	0	0	0	0	1	69	2	13	0
0	0	0	0	0	0	1	67	1	1	0
0	0	0	0	0	0	2	75	1	44	1
0	0	0	0	0	0	1	69	1	8	0
0	0	0	0	0	0	1	59.9726	5	2	0
0	0	0	0	0	0	1	84	1	9	0
0	0	0	0	0	0	1	76	3	3	1
0	0	0	0	0	0	1	63	1	6	1
0	0	0	0	0	0	1	56	2	10	0
0	0	0	0	0	0	2	76	2	3	0
0	0	0	0	0	0	1	70	8	12	1
0	0	0	0	0	0	1	83	1	8	1
0	0	0	0	0	0	2	62.8333	2	76	0
0	0	0	0	0	0	2	64.3397	9	12	1
0	0	0	0	0	0	1	87	1	7	0
1	0	0	0	0	0	1	72	2	75	0
0	0	0	0	0	0	1	81	1	20	1
0	0	0	0	0	0	2	70	1	7	0
0	0	0	0	0	0	2	66	6	24	0
0	0	0	0	0	0	1	59	2	6	0
1	0	0	1	0	0	1	68	6	83	1
0	0	0	0	0	0	1	81	1	19	1
0	0	0	0	0	0	2	69.9014	1	46	1
1	0	0	0	0	0	2	69	6	9	1
1	0	0	0	0	0	2	76	12	37	0
0	0	0	0	0	0	1	51	1	1	0
0	0	0	0	0	0	1	67	1	69	0
1	0	0	0	0	0	1	72	3	14	0
0	0	0	0	0	0	2	75	2	22	0
0	0	0	0	0	0	2	77.6164	5	68	0
0	0	0	0	0	0	2	74	1	38	1
0	0	0	0	0	0	2	88	3	54	0
0	0	0	0	0	0	1	42	5	37	1
0	0	0	0	0	0	2	68	1	8	1
0	0	0	0	0	0	1	71	1	77	0
0	0	0	0	0	0	2	72	1	26	0
0	0	0	0	0	0	1	66	1	4	1
1	0	0	0	0	0	1	74	8	7	1
0	0	0	0	0	0	1	67	2	35	0
0	0	0	0	0	0	1	71	2	42	0
0	0	0	0	0	0	1	66	3	6	0
0	0	0	0	0	0	1	64	6	74	0
1	0	0	1	0	0	1	86	10	40	1
1	0	0	0	0	0	1	71	13	2	1
0	0	0	0	0	0	1	76	1	8	0
0	0	0	0	0	0	1	65	4	20	0
0	0	0	0	0	0	1	69	7	6	0
0	0	0	0	0	0	1	60	1	5	0
1	0	0	0	0	0	1	77	1	4	0
0	0	0	0	0	0	1	68	7	79	0
0	0	0	0	0	0	1	80	1	22	0
0	0	0	0	0	0	2	73	1	87	0
0	0	0	0	0	0	2	61	2	72	0
0	0	0	0	0	0	2	89	1	20	0
0	0	0	0	0	0	1	72	1	14	0
0	0	0	0	0	0	2	64.1616	8	28	0
0	0	0	0	0	0	1	55	2	1	1
0	0	0	0	0	0	1	61	6	35	0
0	0	0	0	0	0	1	99	1	3	1
0	0	0	1	0	0	1	84	2	3	1
0	0	0	0	0	0	1	75	1	28	0
0	0	0	0	0	0	1	68	2	35	1
1	0	0	0	0	0	2	80	4	6	0
0	0	0	0	0	0	1	69	1	1	0
1	0	0	0	0	0	1	52	9	38	0
1	0	0	0	0	0	1	94	1	55	1
1	0	0	0	0	0	1	46	6	4	1
0	0	0	0	0	0	2	62.6301	4	3	0
0	0	0	0	0	0	1	85	1	29	1
0	0	0	0	0	0	2	70	17	43	0
0	0	0	0	0	0	1	82	1	2	1
0	0	0	0	0	0	1	55	8	51	0
0	0	0	0	0	0	2	73	1	29	0
1	0	0	0	0	0	1	62	7	3	0
0	0	0	0	0	0	2	55.75	13	84	0
0	0	0	0	0	0	1	81	1	1	0
1	0	0	0	1	0	1	72	2	65	1
0	0	0	0	0	0	1	74	1	51	0
1	0	0	0	0	0	2	81	6	43	1
0	0	0	0	0	0	1	48.6667	4	56	0
0	0	0	0	0	0	1	74	1	2	1
0	0	0	0	0	0	1	65	1	2	0
0	0	0	0	0	0	1	82.0833	2	3	0
0	0	0	0	0	0	1	45	2	2	0
0	0	0	0	0	0	1	67	4	37	0
0	0	0	1	0	0	2	87	1	3	1
0	0	0	0	0	0	1	77	4	63	0
0	0	0	0	0	0	1	75	1	20	0
0	0	0	0	0	0	2	65	1	25	0
0	0	0	0	0	0	2	75	5	17	0
0	0	0	0	0	0	1	75	1	1	1
0	0	0	0	0	0	2	55	2	68	1
0	0	0	0	0	0	2	67	4	28	1
0	0	0	0	0	0	1	41.1836	6	16	0
0	0	0	0	0	0	1	91.6849	2	12	1
0	0	0	0	0	0	1	69.3452	5	10	0
0	0	0	0	0	0	2	53	1	31	0
0	0	0	0	0	0	1	52	1	29	1
0	0	0	0	0	0	2	66	1	4	0
0	0	0	0	0	0	1	63	1	2	0
0	0	0	0	0	0	2	61	1	6	1
0	0	0	0	0	0	1	70	7	61	0
0	0	0	0	0	0	2	56	8	27	0
0	0	0	0	0	0	1	65	1	23	1
0	0	0	0	0	0	1	73	1	24	0
0	0	0	0	0	0	2	70	1	76	0
0	0	0	0	0	0	1	44	15	25	0
0	0	0	0	0	0	1	69.1288	17	85	0
0	0	0	0	0	0	2	72	1	26	0
0	0	0	0	0	0	1	75.9836	5	5	0
0	0	0	0	0	0	1	88	1	42	0
0	0	0	0	0	0	1	62	1	43	0
0	0	0	0	0	0	1	64.3753	7	77	0
0	0	0	0	0	0	2	64	1	12	1
0	0	0	0	0	0	1	70.7699	15	73	0
0	0	0	0	0	0	1	89	13	13	0
0	0	0	0	0	0	1	92	1	21	0
0	0	0	0	0	0	2	76	1	71	0
0	0	0	0	0	0	1	66	1	35	0
0	0	0	0	0	0	2	87.5833	5	72	0
0	0	0	0	0	0	1	87	1	5	1
0	0	0	0	0	0	1	80	1	2	0
0	0	0	0	0	0	2	60.6877	1	15	1
0	0	0	0	0	0	1	45.6384	10	12	0
0	0	0	0	0	0	1	72	1	2	1
1	0	0	0	0	0	1	86	1	17	0
0	0	0	0	0	0	1	70.6411	11	38	1
0	0	0	0	0	0	2	78.3068	8	7	1
0	0	0	0	0	0	1	90.1644	6	41	1
0	0	0	0	0	0	1	80	2	15	1
0	0	0	0	0	0	2	77	2	8	1
0	0	0	0	0	0	2	55.4167	1	86	0
0	0	0	0	0	0	1	86	1	42	1
0	0	0	0	0	0	1	37.6959	8	85	0
0	0	0	0	0	0	1	55	1	5	0
0	0	0	0	0	0	1	79	1	24	0
0	0	0	0	1	0	1	69.5781	5	9	1
0	0	0	0	0	0	1	85	1	48	1
0	0	0	0	0	0	2	56	2	1	1
1	0	0	0	0	0	2	89	9	10	1
0	0	0	0	0	0	2	72	2	33	0
0	0	0	0	0	0	1	77	1	2	0
0	0	0	0	0	0	1	70.3333	5	82	1
1	0	0	0	0	0	2	80	12	41	1
0	0	0	0	1	0	2	72	1	10	1
0	0	0	0	0	0	1	64	4	11	1
0	0	0	0	0	0	1	60.3918	2	9	0
0	0	0	0	0	0	2	67.9589	10	67	0
0	0	0	0	0	0	1	76	3	20	0
0	0	0	0	0	0	2	68	8	32	1
0	0	0	0	1	0	2	80.8329	17	3	0
0	0	0	0	0	0	1	64.7589	1	25	0
0	1	0	0	0	0	1	70.6667	2	25	1
0	0	0	0	0	0	1	63	2	34	0
0	0	0	0	0	0	1	88	1	10	0
0	0	0	0	0	0	2	61	3	26	0
0	0	0	0	0	0	2	53.8333	1	52	0
0	0	0	0	0	0	2	83	1	6	1
0	0	0	0	0	0	1	67	1	22	0
0	0	0	0	0	0	1	85	8	14	1
0	0	0	0	0	0	1	45.7616	8	20	1
0	0	0	0	0	0	1	52	1	26	1
0	0	1	0	0	0	1	55	1	6	1
0	0	0	0	0	0	1	69	7	22	0
0	0	0	0	0	0	1	71	2	10	0
1	0	0	0	0	0	1	80.6685	2	48	0
0	0	0	0	0	0	1	71	6	36	0
0	0	0	0	0	0	2	62	1	7	0
0	0	0	0	0	0	1	73	2	2	1
0	0	0	0	0	0	1	64.5	2	49	0
0	0	0	0	0	0	2	71	1	1	0
0	0	0	0	0	0	2	76	2	47	1
0	0	0	0	0	0	1	71	3	8	0
0	0	0	0	0	0	1	70	1	53	1
0	0	0	0	0	0	2	44	1	6	1
1	0	0	0	0	0	2	80.274	2	28	0
0	0	0	0	0	0	2	80	2	36	1
0	0	0	0	0	0	1	66	12	27	1
0	0	0	0	0	0	1	56	5	71	0
0	0	0	0	0	0	1	80.8055	13	36	0
0	0	0	0	0	0	1	72	3	30	0
0	0	0	0	0	0	2	69	1	3	0
0	0	0	0	0	0	1	68	1	8	0
0	0	0	0	0	0	1	68	1	3	0
0	0	0	0	0	0	1	67	1	8	1
0	0	0	0	0	0	1	60	1	4	0
0	0	0	0	0	0	1	61.25	2	41	1
0	0	0	0	0	0	1	84	1	11	0
1	1	0	0	0	0	2	80.4301	3	32	1
0	0	0	0	0	0	1	64.926	1	59	1
0	0	0	0	0	0	2	71.8333	5	53	1
0	0	0	0	0	0	2	68	9	15	0
0	0	0	0	0	0	1	68.3973	11	46	1
0	0	0	0	0	0	1	74.9479	5	3	0
0	0	0	0	0	0	1	82	1	14	0
1	0	0	0	0	0	1	90	1	71	0
0	0	0	0	0	0	1	62.2384	1	7	1
0	0	0	0	0	0	1	55.9616	8	71	0
0	0	0	0	0	0	1	78	1	1	0
0	0	0	0	0	0	1	76.9151	5	16	0
0	0	0	0	0	0	2	62	1	37	0
1	0	0	0	0	0	1	73.2712	14	23	1
0	0	0	0	0	0	1	68	1	13	0
0	0	0	0	0	0	2	61	1	19	1
0	0	0	0	0	0	2	61	3	76	0
0	0	0	0	0	0	2	78.6667	1	78	1
0	0	0	0	0	0	1	78	1	22	0
1	0	0	0	0	0	2	54.726	2	8	1
0	1	0	0	0	0	2	54.3333	1	40	1
1	0	0	0	0	0	1	71	3	17	0
0	0	0	0	0	0	2	77	1	12	1
0	0	0	0	0	0	1	69	1	17	1
0	0	0	0	0	0	1	73	2	1	1
0	0	0	0	0	0	2	78.3507	8	14	1
0	0	0	0	0	0	1	70	6	25	0
0	0	0	0	0	0	1	63	1	35	0
0	0	0	0	0	0	1	63	1	82	1
0	1	0	0	0	0	2	65	1	16	1
0	0	0	0	0	0	1	88	1	14	0
0	0	0	0	0	0	1	78.3945	2	57	0
0	0	0	0	0	0	1	59.1808	10	16	0
0	0	0	0	0	0	1	75	10	1	0
0	0	0	0	0	0	2	80	5	3	0
0	0	0	0	0	0	1	86.3589	1	13	0
0	0	0	0	0	0	1	64	3	30	0
0	0	0	0	0	0	2	72	3	6	0
0	0	0	0	0	0	1	82	1	17	0
0	0	0	0	0	0	1	68	1	49	1
1	0	0	0	1	0	2	80.2329	8	10	1
0	0	0	0	0	0	1	68.3315	1	22	1
0	0	0	0	0	0	1	83	3	24	1
0	0	0	0	0	0	2	80	1	76	0
0	0	0	0	0	0	1	84	2	28	0
0	0	0	0	0	0	2	82.5123	10	10	1
0	0	0	0	0	0	1	75.5726	6	4	0
0	0	0	0	0	0	2	55.1667	6	42	0
0	0	0	0	0	0	1	84	3	2	0
0	0	0	0	0	0	1	79	1	34	0
0	0	0	0	0	0	1	75	1	11	0
0	0	0	0	0	0	2	53	10	48	0
0	0	0	0	0	0	2	85.7918	7	15	0
0	0	0	1	0	0	2	74.6384	6	14	1
0	0	0	0	0	0	1	78.1014	3	17	1
0	0	0	0	0	0	2	65.5833	1	4	1
0	0	0	0	0	0	1	83	6	29	1
0	0	0	0	0	0	1	72	1	9	1
0	0	0	0	0	0	1	76	1	3	0
0	0	0	0	0	0	1	70.8192	1	27	0
0	0	0	0	0	0	2	80	1	19	1
0	0	0	0	0	0	1	78	1	82	0
0	1	0	0	0	0	1	82.4493	3	76	1
0	0	0	0	0	0	1	74	1	23	0
0	0	0	0	0	0	1	67	1	8	1
0	0	0	0	0	0	2	74.4164	1	71	1
0	0	0	0	0	0	1	80	1	3	0
0	0	0	0	0	0	1	28.7178	2	16	0
0	0	0	0	0	0	1	59	22	7	1
0	0	0	0	0	0	1	83.7671	1	3	0
0	0	0	0	0	0	1	62.3397	4	10	1
0	0	0	0	0	0	2	81.6849	9	5	1
0	0	0	0	0	0	2	72	5	7	1
0	0	0	0	0	0	2	64	1	39	0
0	0	0	0	0	0	2	54.2959	15	11	1
0	0	0	0	0	0	2	74	2	16	0
0	0	0	0	0	0	1	67	1	6	0
0	0	0	0	0	0	2	78	1	27	0
0	0	0	0	0	0	2	57.9452	17	11	1
0	0	0	0	0	0	1	70.0712	5	10	0
1	0	0	0	0	0	2	64	9	15	1
0	0	0	0	0	0	2	56	11	3	1
0	0	0	0	0	0	2	89	1	19	0
0	0	0	0	0	0	2	76	1	6	1
0	0	0	0	1	0	1	75	1	40	1
0	0	0	0	0	0	2	80	1	49	1
0	0	0	0	0	0	2	69	1	5	0
0	0	0	0	0	0	2	70	3	9	0
0	0	0	0	0	0	1	70.874	11	23	0
0	0	0	0	0	0	1	72	1	31	0
0	0	0	0	0	0	2	43.6959	17	14	0
0	0	0	0	0	0	1	45	16	5	0
0	0	0	0	0	0	1	69.3479	1	6	1
0	0	0	0	0	0	1	64	2	58	0
0	0	0	0	0	0	1	85	1	14	0
0	0	0	0	0	0	2	64	1	21	1
0	0	0	0	0	0	1	77	1	22	1
1	0	0	0	0	0	2	78	7	6	1
1	0	0	0	0	0	1	55.9123	9	5	0
1	0	0	0	0	0	2	84.6767	9	69	1
0	0	0	0	0	0	2	81.6712	3	32	0
0	0	0	0	0	0	2	58.9534	7	7	0
0	0	0	0	0	0	1	77	8	45	0
0	0	0	0	0	0	1	68	2	70	0
0	0	0	0	0	0	2	58.8137	12	6	1
0	0	0	0	0	0	1	63	1	6	0
0	0	0	0	0	0	1	61	1	29	0
0	0	0	0	0	0	2	81	9	7	0
0	0	1	0	0	0	2	70	6	14	1
0	0	0	0	0	0	1	78	2	14	0
1	0	0	0	0	0	1	81.589	4	13	0
0	0	0	0	0	0	1	56	4	23	0
0	0	0	0	0	0	1	76.074	8	12	0
0	0	0	0	0	0	2	38.4767	2	14	0
0	0	0	0	0	0	2	70.9836	1	45	0
0	0	0	0	0	0	1	64.1452	18	7	0
0	0	0	0	0	0	1	69	1	20	0
0	0	0	0	0	0	1	58	1	3	0
0	0	0	0	0	0	2	70	1	42	0
0	0	0	0	0	0	2	59.8904	10	11	0
0	0	0	0	0	0	1	84	9	4	1
0	0	0	0	0	0	1	68.537	1	22	0
0	0	0	0	0	0	2	67	1	45	0
0	0	0	0	0	0	2	69	8	13	0
1	0	0	0	0	0	2	73.1123	10	10	1
0	0	0	0	0	0	1	45	7	48	1
0	0	0	0	0	0	1	58.5644	20	5	0
0	0	0	0	0	0	1	81	1	32	1
0	0	0	0	0	0	2	64.9425	1	55	1
0	0	0	0	0	0	1	75	1	48	0
0	0	0	0	0	0	2	84.1507	14	55	0
0	1	0	0	0	0	2	60	3	18	1
0	0	0	0	0	0	2	65	1	3	0
1	0	0	0	0	0	1	77	4	51	0
0	0	0	0	0	0	1	62	12	40	1
0	0	0	0	0	0	1	83.011	26	20	0
0	0	0	0	0	0	1	44	1	67	1
0	0	0	0	0	0	1	62	2	17	0
0	0	0	0	0	0	2	64	1	48	0
0	0	0	0	0	0	2	68	3	36	0
0	0	0	0	0	0	1	41	5	19	1
0	0	0	0	0	0	1	79	1	17	0
1	0	0	0	0	0	1	84.2493	53	2	1
0	0	0	0	0	0	1	91.8904	5	21	0
0	0	0	0	0	0	1	80	1	8	1
0	0	0	0	0	0	1	65	3	41	0
0	0	0	0	0	0	2	68	2	11	1
0	0	0	0	0	0	2	81	16	2	0
0	0	0	0	0	0	1	81.0822	11	9	0
0	0	0	0	0	0	1	69	6	6	1
0	0	0	0	0	0	1	80	10	4	1
0	0	0	0	0	0	2	74.6219	5	3	0
0	0	0	0	0	0	1	68	7	5	1
0	0	0	0	0	0	2	73.3123	14	3	0
0	0	0	0	0	0	2	70	3	33	0
0	0	0	0	0	0	1	69.1667	2	10	0
0	0	0	0	0	0	2	70.0219	3	2	0
0	0	0	0	0	0	1	75.5479	8	11	0
0	0	0	0	0	0	2	66.3342	2	2	0
0	0	0	0	0	0	1	73	5	2	1
0	0	0	0	0	0	1	69	1	5	1
1	0	0	0	0	0	2	77	2	6	1
0	0	0	0	0	0	1	76	2	21	0
1	0	0	0	0	0	1	68.4137	5	35	1
0	0	0	0	0	0	1	61	2	17	1
0	0	0	0	0	0	1	77.6329	7	35	1
0	0	0	0	0	0	1	61	8	15	1
0	0	0	0	0	0	1	45.6	3	4	0
0	0	0	0	0	0	1	77	1	71	1
1	0	0	0	0	0	1	58.9753	8	3	1
0	0	0	0	0	0	1	48.1562	3	22	0
0	0	0	0	0	0	1	84.3781	8	10	0
0	0	0	0	0	0	2	55.9233	11	14	0
0	0	0	0	0	0	2	73	1	10	0
0	0	0	0	0	0	1	88	7	1	0
0	0	0	0	0	0	2	77	1	7	0
1	0	0	0	0	0	2	74.9397	12	2	0
0	0	0	0	0	0	2	79	9	11	0
1	0	0	0	0	0	2	78	1	42	1
0	1	0	0	0	0	1	75	1	37	0
0	0	0	0	0	0	2	75	1	82	1
0	0	0	0	0	0	2	74.5178	6	31	0
0	0	0	0	0	0	1	70	1	7	0
0	0	0	0	0	0	2	71.126	14	9	0
0	0	0	0	0	0	2	61	2	50	0
0	0	0	0	0	0	1	67.7205	7	13	0
0	0	0	0	0	0	2	77	1	46	1
0	0	0	0	0	0	1	66.1479	2	10	0
0	0	0	0	0	0	1	77	1	8	0
0	0	0	0	0	0	1	67.0658	5	3	0
0	0	0	0	0	0	2	76.0438	1	36	0
0	0	0	0	0	0	2	75.789	5	2	0
1	0	0	0	0	1	2	85.1096	3	18	1
1	0	0	0	0	0	1	83	6	28	0
0	0	0	0	0	0	2	90	1	7	0
0	0	0	0	0	0	1	65.611	3	8	0
0	0	0	0	0	0	2	75.5096	13	5	0
0	0	0	0	0	0	1	75	1	45	0
0	0	0	0	0	0	1	68	10	10	0
0	0	0	0	0	0	2	73	7	9	0
0	0	0	0	0	0	1	73.5534	10	5	1
1	0	0	0	0	0	1	69.326	10	27	0
0	0	0	0	0	0	1	70	1	2	0
0	0	0	0	0	0	1	59.7836	6	7	0
0	0	0	0	0	0	1	73.1041	1	11	0
0	0	0	0	0	0	2	80	8	8	0
0	0	0	0	0	0	2	82	1	4	0
0	0	0	0	0	0	2	66.5041	6	2	0
0	0	0	0	0	0	2	71.5014	3	2	0
0	0	0	0	0	0	2	71	3	41	0
0	0	0	0	0	0	2	78	15	45	0
0	0	0	0	0	0	1	75.7096	8	2	0
1	0	0	0	0	0	1	79.3507	2	18	1
0	0	0	0	0	0	1	83	10	9	0
0	0	0	0	0	0	2	74.0904	1	48	0
0	0	0	0	0	0	1	84	5	32	1
0	0	0	0	0	0	1	72	2	25	0
0	0	0	0	0	0	2	73	9	23	1
1	0	0	0	0	0	2	74.8137	13	4	0
1	0	0	0	0	0	1	80.0795	6	7	0
0	0	0	0	0	0	1	84.8192	7	2	0
1	0	0	0	0	0	1	81	11	9	0
0	0	0	0	0	0	1	64	1	4	0
1	0	0	0	0	0	1	81	12	34	1
0	0	0	0	0	0	1	37.8849	5	7	0
1	0	0	0	0	0	2	82.811	4	2	1
0	0	0	0	0	0	1	85	2	56	0
0	0	0	0	0	0	1	55	2	21	0
0	0	0	0	0	0	2	76.8822	6	4	1
0	0	0	0	0	0	1	54	10	8	1
1	0	0	0	0	0	2	91	15	22	1
0	0	0	0	0	0	1	84.0027	2	21	1
0	0	0	0	0	0	1	74.074	7	29	1
0	0	0	0	0	0	2	73	1	9	0
0	0	0	0	0	0	2	60.4658	19	12	0
1	1	0	0	0	0	2	72	11	7	1
0	0	0	0	0	0	2	69.6548	3	7	0
0	0	0	0	0	0	1	74	1	16	0
0	0	0	0	0	0	1	65	10	50	0
0	0	0	0	0	0	1	68	1	1	0
0	0	0	0	0	0	1	88.7425	2	9	1
0	0	0	0	0	0	1	71.6301	1	50	0
0	0	0	0	0	0	1	57	6	22	0
1	0	0	0	0	0	2	81	14	69	1
0	0	0	0	0	0	1	72	1	26	0
1	0	0	0	0	0	1	80.3671	15	18	0
0	0	0	0	0	0	2	70	1	24	0
0	0	0	0	0	0	1	66	1	9	0
0	0	0	0	0	0	1	79.8274	2	19	1
0	0	0	0	0	0	2	74	1	31	0
0	0	0	0	0	0	1	72.5151	1	73	0
1	0	0	0	0	0	1	74.7288	1	69	0
1	0	0	0	0	0	1	76	1	78	1
0	0	0	0	0	0	2	82.6164	1	9	1
0	0	0	0	0	0	2	61.3781	10	49	0
0	0	0	1	0	0	2	82	12	18	1
1	0	0	0	1	1	2	67	1	23	1
0	0	0	0	0	0	1	63.5781	1	10	1
0	0	0	0	0	0	1	75	7	13	0
0	0	0	0	0	0	2	76.2493	11	34	0
0	0	0	0	0	0	2	71.4932	1	14	0
0	0	0	0	0	0	1	80	5	10	0
0	0	0	0	0	0	1	73	7	10	0
1	0	0	0	0	0	1	76	1	18	1
1	0	0	0	0	0	1	80.2877	4	48	0
0	0	0	0	0	0	1	70.7452	7	20	0
1	0	0	0	0	1	2	72	7	27	1
0	0	0	0	0	0	2	51	1	45	0
0	0	0	0	0	0	2	77.1589	5	8	0
0	0	0	0	0	0	1	66	10	58	0
0	1	0	0	0	0	1	84.3726	3	31	1
1	1	0	0	0	0	2	79	8	2	0
1	0	0	0	0	0	1	49	1	5	1
0	0	0	0	0	0	1	63	1	8	0
0	0	0	0	0	0	1	87	4	36	0
0	0	0	0	0	0	2	68	3	34	0
0	0	0	0	0	0	1	52	1	12	0
1	0	0	0	0	0	2	66.5808	11	3	1
0	1	0	0	0	0	1	67.1178	12	6	0
0	0	0	0	0	0	1	65	1	40	0
0	0	0	0	0	0	2	61	9	33	0
0	0	0	0	0	0	2	82	1	14	0
1	0	0	0	0	0	2	73.9123	12	14	1
1	0	0	0	0	0	2	89	1	71	0
0	0	0	0	0	0	1	74.8	3	10	0
0	0	0	0	0	0	1	74	3	1	0
1	0	0	0	0	0	2	73.7425	9	55	0
1	0	0	0	0	0	2	59	7	6	0
1	0	0	0	0	0	1	70	4	8	0
1	0	0	0	0	0	2	84.011	5	44	1
0	0	0	0	0	0	1	65.3068	1	65	0
1	0	0	0	0	0	1	66	4	13	0
1	0	0	0	0	0	1	76	3	41	0
0	0	0	0	0	0	2	66	1	7	0
0	0	0	0	0	0	2	70.0877	10	41	0
0	0	0	0	0	0	1	78	10	6	0
1	0	0	0	0	0	1	73.7918	2	49	0
0	0	0	0	0	0	1	85	10	77	0
1	0	0	0	0	0	1	78.2603	1	38	1
0	0	0	0	0	0	1	74.1014	3	1	0
0	0	0	0	0	0	1	79	6	11	0
0	0	0	0	0	0	2	70	6	20	0
0	0	0	0	0	0	1	75	1	27	0
0	0	0	0	0	0	1	76	5	20	0
0	0	0	0	0	0	1	65.137	9	43	0
0	0	0	1	0	0	1	86	1	2	0
1	0	0	0	0	0	1	68.1041	9	4	1
1	1	0	0	0	0	1	75.2548	10	2	1
1	0	0	0	0	0	1	61.126	5	5	0
0	0	0	0	0	0	1	64.0247	1	12	0
0	0	0	0	0	0	1	69.4	5	86	0
0	0	0	0	0	0	2	83.8055	1	60	0
0	0	0	0	0	0	1	79	3	53	0
0	0	0	0	0	0	1	71.1507	12	19	0
0	0	0	0	0	0	1	55.8959	1	25	0
1	0	1	0	0	0	1	77.1534	7	48	1
1	0	0	0	0	0	1	79	1	53	0
0	0	0	0	0	0	1	76	5	33	0
0	0	0	0	0	0	1	73.1479	5	1	0
0	0	0	0	0	0	1	76	4	46	0
0	0	0	0	0	0	2	67	1	3	0
0	0	0	0	0	0	2	85.1315	9	13	1
0	0	0	0	0	0	1	86	1	20	0
1	0	0	0	0	0	2	84.789	4	71	0
0	0	0	0	0	0	1	69	1	13	0
0	0	0	0	0	0	2	75.2767	5	6	0
0	0	0	0	0	0	1	79.6575	5	6	0
0	0	0	0	0	0	2	75	5	14	0
0	0	0	0	0	0	1	65	11	66	0
0	0	0	0	0	0	2	73	5	2	0
0	0	0	0	0	0	1	71	5	16	0
0	0	0	0	1	0	1	70.3123	5	70	1
1	0	0	0	0	0	1	70	4	3	0
0	0	0	0	0	0	2	76.0055	10	4	0
0	0	0	0	0	0	2	84	2	63	0
0	0	0	0	0	0	2	68.4932	4	4	0
0	0	0	0	0	0	1	82.9151	4	7	0
0	0	0	0	0	0	1	81.4658	14	7	0
1	0	0	1	0	0	2	84	7	1	1
0	0	0	0	0	0	2	65.4603	20	62	1
0	0	0	0	0	0	1	55	5	21	0
1	0	0	0	0	0	1	74	1	90	1
1	1	0	0	0	0	1	73.474	7	8	1
0	0	0	0	0	0	2	70	1	4	0
0	0	0	0	0	0	1	74.7397	2	10	0
0	0	0	0	0	0	1	71	12	2	1
0	0	0	0	0	0	1	71	1	32	0
1	0	0	0	0	0	1	83	5	16	0
0	0	0	0	0	0	1	60.0658	8	31	0
0	0	0	0	0	0	1	76.9288	1	61	0
0	0	0	0	0	0	1	68.3671	8	27	0
0	0	0	0	0	0	1	69	1	7	1
0	0	0	0	0	0	2	75.0329	3	1	0
0	0	0	0	0	0	1	70.7151	11	7	0
0	0	0	0	0	0	1	77.0055	1	55	0
1	0	0	0	0	0	1	79.3753	3	40	0
1	0	0	0	0	0	1	84	2	3	1
0	0	0	0	0	0	1	76.011	7	13	0
1	0	0	0	0	0	1	71.0164	6	48	0
0	0	0	0	0	0	1	65	1	9	0
0	0	0	0	0	0	2	63	2	3	0
0	0	0	0	0	0	1	75	7	8	0
0	0	0	0	0	0	1	79	6	63	0
1	0	0	0	0	0	1	71.5315	7	32	0
1	0	0	0	0	0	1	77.6	3	64	1
1	0	0	0	0	0	1	84.5562	9	14	1
0	0	0	0	0	0	1	66.7781	11	10	0
1	0	0	0	0	0	1	71	8	3	1
0	0	0	0	0	0	1	81.8712	1	27	0
0	0	0	0	0	0	1	67.0575	6	55	1
0	0	0	0	0	0	1	89.2466	1	70	0
0	0	0	0	0	0	2	67.1562	1	13	0
1	0	0	0	0	0	2	76.0219	8	12	0
0	0	0	0	0	0	1	72.3753	7	18	0
0	0	0	0	0	0	1	89	6	15	0
0	0	0	0	0	0	2	65	1	18	0
0	0	0	0	0	0	2	81	1	20	0
0	0	0	0	0	0	1	75.7096	2	14	1
0	0	0	0	0	0	1	70.274	1	47	1
0	0	0	0	0	0	2	77	1	15	0
1	0	0	0	0	0	1	84.8082	16	52	1
0	0	0	0	0	0	1	88	1	48	0
0	0	0	0	0	0	1	46.8986	1	7	0
0	0	0	0	0	0	2	66.4904	4	26	1
1	0	0	0	0	0	1	68.5671	2	24	0
0	0	0	0	0	0	2	49.7342	10	8	0
0	0	0	0	0	0	2	79	1	44	0
0	0	0	0	0	0	2	83.7808	6	12	0
0	0	0	0	0	0	1	85	2	56	0
1	0	0	0	0	0	1	78.6	15	3	1
0	0	0	0	0	0	2	81.5699	5	28	0
0	0	0	0	0	0	1	80	1	2	0
1	0	0	0	0	0	1	78.9205	1	12	0
0	0	0	0	0	0	1	82	8	47	1
1	0	0	0	0	0	1	56.1315	1	44	0
0	0	0	0	0	0	1	77.126	7	6	0
0	0	0	0	0	0	2	75	4	6	0
1	0	0	0	0	0	2	90	8	10	1
0	0	0	0	0	0	1	66	1	22	0
0	0	0	0	0	0	1	91	9	6	1
1	0	0	0	0	0	1	60.4055	5	77	0
0	0	0	0	0	0	1	53	3	84	0
0	0	0	0	0	0	1	69	1	35	0
0	0	0	0	0	0	2	77.0603	2	11	0
0	0	0	0	0	0	1	74	3	28	0
0	0	0	0	0	0	1	90	1	76	0
0	0	0	0	0	0	1	52.5151	2	36	0
1	1	0	0	0	0	2	87.6192	2	56	1
0	0	0	0	0	0	1	84.6603	4	1	0
0	0	0	0	0	0	1	39.5288	1	81	0
0	0	0	0	0	0	2	69	1	26	0
1	1	1	0	0	1	2	71.1342	2	50	1
0	0	0	0	0	0	1	71	1	40	0
0	0	0	0	0	0	1	64.326	3	22	0
0	0	0	0	0	0	2	75	1	64	0
0	0	0	0	0	0	2	75.1315	10	10	0
1	0	0	0	0	0	2	87	5	28	1
0	0	0	0	0	0	2	70.5753	4	28	0
0	0	0	0	0	0	1	77	3	2	0
0	0	0	0	0	0	2	42	1	8	0
0	0	0	0	0	0	1	82	2	5	0
1	0	0	0	0	0	1	66.7863	9	39	1
0	0	0	0	0	0	1	69	1	20	0
0	0	0	0	0	0	1	85.3534	6	27	0
0	0	0	0	0	0	2	77.5562	3	21	0
0	0	0	0	0	0	1	75	6	25	0
0	1	0	0	0	0	1	51.9452	1	34	1
0	0	0	0	0	0	2	74	3	20	0
0	0	0	0	0	0	1	52.1945	1	70	0
0	0	0	0	0	0	1	77.3014	1	25	0
0	0	0	0	0	0	2	76	1	14	0
1	0	0	0	0	0	2	73	1	90	0
0	0	0	0	0	0	2	69	4	12	0
0	0	0	0	0	0	1	75	8	60	0
0	0	0	0	0	0	1	74	1	7	0
0	0	0	0	0	0	1	72	7	34	0
0	0	0	0	0	0	2	71.6822	4	77	0
0	0	0	0	0	0	1	68	8	19	0
0	0	0	0	0	0	2	73.3068	12	24	0
0	1	0	0	0	0	2	75.6192	3	43	1
0	0	0	0	0	0	1	76	4	7	0
1	0	0	0	0	0	1	71.9918	5	11	0
0	0	0	0	0	0	1	71.2356	14	7	0
0	0	0	0	0	0	1	79.1863	1	14	0
1	0	0	0	0	0	1	81	4	24	1
0	0	0	0	0	0	1	64.4411	9	76	1
0	0	0	0	0	0	1	75.9589	17	77	1
0	0	0	0	0	0	1	77.8493	1	5	0
0	0	0	0	0	0	1	65	2	4	0
0	0	0	0	0	0	1	85	10	7	0
0	0	0	0	0	0	1	70	3	23	0
0	0	0	0	0	0	1	70	1	21	0
0	0	0	0	0	0	1	73	1	27	0
0	0	0	0	0	0	1	76	1	90	0
0	0	0	0	0	0	1	81.326	9	22	0
0	0	0	0	0	0	1	73	1	19	0
0	0	0	0	0	0	1	63.3425	4	9	0
0	0	1	0	0	0	2	49	20	4	0
1	0	0	0	0	0	2	78	3	61	0
0	0	0	0	0	0	1	52	1	10	0
0	0	1	0	0	0	1	80.8493	4	1	0
0	0	0	0	0	0	1	60	1	39	1
1	0	0	0	0	0	1	80	5	51	0
0	0	0	0	0	0	1	79.5096	5	28	0
1	0	0	0	0	0	1	81	2	2	1
0	0	0	0	0	0	1	84.6329	4	17	0
1	0	0	0	0	0	2	70	1	2	0
0	0	0	0	0	0	1	65	2	21	1
0	0	0	0	0	0	1	88	2	61	0
0	0	0	0	0	0	1	84.9342	4	33	0
0	0	0	0	0	0	1	67	2	8	0
0	0	0	0	0	0	1	59.4274	1	5	0
0	0	0	0	0	0	2	73.4055	5	53	0
0	0	0	0	0	0	1	70	1	5	1
1	0	0	0	1	0	1	74	14	39	1
1	0	0	0	0	0	1	86	9	7	1
1	0	0	0	0	0	1	58.9589	11	8	0
0	0	0	0	0	0	1	80	2	1	1
0	0	0	0	0	0	1	69	1	3	0
1	0	0	0	0	0	2	85	1	30	1
0	0	0	0	0	0	1	75	1	84	1
0	0	0	0	0	0	1	74	6	19	1
1	0	0	0	0	1	2	75	14	7	1
0	0	0	0	0	0	1	74.0658	2	34	0
0	0	0	0	0	0	1	68	1	2	0
0	0	0	0	0	0	1	58	2	18	0
0	0	0	0	0	0	1	83	1	2	0
1	0	0	0	0	0	1	65	8	5	1
0	0	0	0	0	0	1	60	3	8	0
0	0	0	0	0	0	2	48.5863	1	87	1
0	0	0	0	0	0	2	48.5863	1	87	1
0	0	0	0	0	0	1	81	13	1	0
0	0	0	0	0	0	2	76.8466	1	16	1
0	0	0	0	0	0	1	70	1	2	0
0	0	0	0	0	0	1	77	1	25	1
0	0	0	0	0	0	2	78	11	6	0
0	0	0	0	0	0	2	89	9	6	1
0	0	0	0	0	0	2	66	1	18	0
0	0	0	0	0	0	1	80.5507	3	28	0
0	0	0	0	0	0	2	70.9726	1	3	1
0	0	0	0	0	0	2	71	1	18	0
0	0	0	0	0	0	1	67	7	5	0
0	0	0	0	0	0	1	75	2	20	0
0	0	0	0	0	0	1	46.5726	2	8	0
0	0	0	0	0	0	2	73	3	25	0
0	0	0	0	0	0	2	70.9205	1	52	0
0	0	0	0	0	0	2	70	1	4	0
0	0	0	0	0	0	2	72	1	81	0
0	0	0	0	0	0	2	82.2521	1	40	1
0	0	0	0	0	0	1	77	1	6	0
0	0	0	0	0	0	1	78	5	9	1
0	0	0	0	0	0	1	68.8849	7	28	0
1	0	0	0	0	0	1	76	4	14	0
1	0	0	0	0	0	1	77	4	1	1
0	0	0	0	0	0	1	74	7	9	1
0	0	0	0	0	0	2	69	3	61	0
0	0	0	0	0	0	2	56	7	56	0
0	0	0	0	0	0	2	69	4	4	0
1	0	0	0	0	0	2	83	1	90	1
0	0	0	0	0	0	1	76	7	11	1
0	0	0	0	0	0	1	63.6904	1	78	1
0	0	0	0	0	0	2	82	9	22	0
0	0	1	0	0	0	1	71.9753	1	32	1
0	0	0	0	0	0	1	67.6466	1	19	1
0	0	0	0	0	0	2	71.6027	1	31	1
0	0	0	0	0	0	2	51.189	8	5	0
0	0	0	0	0	0	1	57.6055	1	34	1
0	0	0	0	0	0	1	62.1699	1	66	1
0	0	0	0	0	0	1	71	8	63	0
0	0	0	0	0	0	1	65	1	1	0
0	0	0	0	0	0	2	62.9068	1	41	1
0	0	0	0	0	0	1	76	9	7	0
0	0	0	0	0	0	1	76.5315	10	13	0
0	0	0	0	0	0	1	70	1	4	1
0	0	0	0	0	0	2	76.263	5	14	0
0	0	0	0	0	0	1	75	1	13	0
0	0	0	0	0	0	2	54	1	85	0
1	0	0	0	0	0	1	79.0055	11	88	1
0	0	0	0	0	0	2	67	1	9	0
0	0	0	0	0	0	2	62.4301	1	14	0
0	0	0	0	0	0	1	56	6	7	0
0	0	0	0	0	0	2	85	3	2	0
0	0	0	0	0	0	2	70	1	36	0
0	0	0	0	0	0	1	74	2	17	0
0	0	0	0	0	0	1	45.1973	1	19	1
0	0	0	0	0	0	1	72	3	13	0
0	0	0	0	0	0	1	57.2685	1	9	0
0	0	0	0	0	0	2	76	1	10	1
0	0	0	0	0	0	1	70	1	16	0
1	0	0	0	0	0	2	75	6	32	0
0	0	0	0	0	0	1	55.3781	1	54	1
0	0	0	0	0	0	1	58.0904	1	40	1
0	0	0	0	0	0	2	78	10	67	0
0	0	0	0	0	0	1	75.874	15	2	0
0	0	0	0	0	0	2	75	1	78	0
0	0	0	0	0	0	1	57	2	6	0
0	0	0	0	0	0	1	78	7	76	0
0	0	0	0	0	0	2	91	10	4	1
1	0	0	0	0	0	1	75.6329	4	2	0
0	0	0	0	0	0	2	72	6	8	0
0	0	0	0	0	0	2	52.5425	1	3	1
0	0	0	0	0	0	2	78	4	35	1
0	0	0	0	0	0	1	87.5178	1	16	1
0	0	0	0	0	0	1	65	1	3	0
1	0	0	0	0	0	1	78	1	7	0
0	0	0	0	0	0	2	54	1	12	0
0	0	0	0	0	0	1	85	1	83	0
0	0	0	0	0	0	1	85	1	21	0
1	0	0	0	0	0	1	81	1	20	0
0	0	0	0	0	0	1	66	1	15	0
0	0	0	0	0	0	1	73	1	6	0
1	0	0	0	0	0	1	73	1	2	0
0	0	0	0	0	0	1	79	1	6	0
0	0	0	0	0	0	1	69	1	1	0
0	0	0	0	0	0	2	74	1	3	0
0	0	0	0	0	0	1	78	1	21	0
0	0	0	0	0	0	1	68	1	12	0
1	0	0	0	0	0	1	73	1	1	0
0	0	0	0	0	0	1	74	1	25	0
0	0	0	0	0	0	2	76	1	11	0
0	0	0	0	0	0	2	76	1	9	0
1	0	0	0	0	0	1	72	1	16	0
0	0	0	0	0	0	1	90	1	14	0
0	0	0	0	0	0	1	53.5	19	84	0
0	0	0	0	0	0	2	66.4274	6	51	0
0	0	0	0	0	0	1	56.4603	3	11	1
0	0	0	0	0	0	1	59	2	1	0
0	0	0	0	0	0	2	69.9781	1	25	0
0	0	0	0	0	0	1	78.8795	9	19	0
0	0	0	0	0	0	2	57.4493	1	12	1
0	0	0	0	0	0	1	80.9342	5	11	0
0	0	0	0	0	0	2	64	1	2	0
0	0	0	0	0	0	2	68	3	1	0
0	0	0	0	0	0	2	88.1507	1	47	1
0	0	0	0	0	0	2	75.7342	1	73	1
0	0	0	0	0	0	2	83.5123	3	42	0
0	0	0	0	0	0	1	72	4	15	1
0	0	0	0	0	0	1	87	5	14	0
1	0	0	0	0	0	2	86	8	10	1
0	0	0	0	0	0	1	81.8164	1	75	1
0	0	0	0	0	0	1	41.2712	1	83	1
0	0	0	0	0	0	2	69.9836	1	39	1
0	0	0	0	0	0	1	86.3479	7	3	0
0	0	0	0	0	0	1	79	1	9	0
0	0	0	0	0	0	2	55.7068	1	48	1
0	0	0	0	0	0	1	51	8	34	0
0	0	0	0	0	0	2	55.789	1	61	1
0	0	0	0	0	0	2	67.8027	1	43	1
0	0	0	0	0	0	1	77	15	17	0
0	0	0	0	0	0	1	70.1836	2	28	0
0	0	0	0	0	0	2	74.5833	1	62	0
0	0	0	0	0	0	2	77.4411	13	8	0
1	0	0	0	0	0	1	60	6	53	0
0	0	0	0	0	0	1	54.1863	1	29	0
0	0	0	0	0	0	2	66.0027	1	8	1
0	0	0	0	0	0	2	48.5041	7	14	1
0	0	0	0	0	0	2	74	1	10	0
1	0	0	0	0	0	1	69	1	5	0
0	0	0	0	0	0	2	58.5918	1	69	0
0	0	0	0	0	0	1	67.2219	6	56	1
0	0	0	0	0	0	1	87	1	5	0
1	0	0	0	0	0	1	79	6	41	1
0	0	0	0	0	0	1	64.6986	1	27	1
0	0	0	0	0	0	2	70	1	42	0
0	0	0	0	0	0	1	72	1	4	0
0	0	0	0	0	0	1	77	1	28	0
0	0	0	0	0	0	1	71	5	21	0
0	0	0	0	0	0	2	36	1	37	0
0	0	0	0	0	0	1	76	1	41	0
0	1	0	0	0	0	1	86	5	8	1
0	0	0	0	0	0	2	57	4	6	0
0	0	0	0	0	0	2	65.9973	1	87	1
0	0	0	0	0	0	1	71	7	15	0
1	0	0	0	0	0	1	83.1178	6	8	1
0	0	0	0	0	0	1	41.811	1	16	1
0	0	0	0	0	0	1	79.3973	1	75	1
0	0	0	0	0	0	2	60.7836	1	4	1
0	0	0	0	0	0	2	70	6	83	1
0	0	0	0	0	0	1	53.411	10	28	0
0	0	0	0	0	0	2	86.2712	1	50	1
0	0	0	0	0	0	1	82.7671	1	49	1
1	0	0	0	0	0	1	76	1	25	0
0	0	0	0	0	0	2	78	6	6	1
0	0	0	0	0	0	1	61.2082	1	17	1
0	0	0	0	0	0	1	73.9342	3	38	0
0	0	0	0	0	0	2	70.0986	2	26	0
0	0	0	0	0	0	1	64.7863	1	38	1
0	1	0	0	0	0	2	90.5068	1	57	1
0	0	0	0	0	0	1	53.4712	10	50	0
1	0	0	0	0	0	2	73.2	21	33	0
0	0	0	0	0	0	1	70	1	28	0
0	0	0	0	0	0	2	78.5151	1	6	1
0	0	0	0	0	0	2	49.0877	1	23	1
0	0	0	0	0	0	2	63.8411	1	64	1
0	0	0	0	0	0	1	74.1178	2	2	0
1	0	0	1	0	0	2	80.8603	3	22	0
0	0	0	0	0	0	1	50.3616	1	19	1
0	0	0	0	0	0	2	75.4904	1	33	1
1	1	0	0	0	0	1	70.6959	1	65	0
0	0	0	0	0	0	1	59.3945	1	53	0
0	0	0	0	0	0	1	66.5589	1	58	1
0	0	0	0	0	0	1	77	1	67	1
0	0	0	0	0	0	2	78	1	47	1
0	0	0	0	0	0	2	73.0959	6	57	0
0	0	0	0	0	0	2	80	5	8	0
0	0	0	0	0	0	1	38	1	7	0
0	0	0	0	0	0	1	88	1	29	0
0	0	0	0	0	0	1	58.6247	1	8	1
0	0	0	0	0	0	2	48.8	6	7	0
0	0	0	0	0	0	1	64.989	4	4	0
0	0	0	0	0	0	1	48.2164	2	73	1
0	0	0	0	0	0	2	70	9	32	1
0	0	0	0	0	0	1	66.6137	1	72	1
0	0	0	0	0	0	1	59.9342	18	52	0
0	0	0	0	0	0	2	75.7151	1	19	1
0	1	0	0	0	0	1	51	8	60	1
0	0	0	0	0	0	1	82.0082	1	3	0
0	0	0	0	0	0	2	72.7205	1	38	0
0	0	0	0	0	0	2	60.9151	1	73	1
0	0	0	0	0	0	1	76	10	50	1
1	0	0	0	0	0	2	77	5	82	0
0	0	0	0	0	0	1	84.663	1	37	1
0	0	0	0	0	0	1	58	1	80	0
0	0	0	0	0	0	1	83	1	34	1
0	0	0	0	0	0	1	70	12	17	1
0	0	0	0	0	0	2	83	1	61	0
0	0	0	0	0	0	2	79.5918	1	23	1
0	0	0	0	0	0	1	90	4	27	1
0	0	0	0	0	0	2	84	7	59	0
0	0	0	0	0	0	2	65	1	15	1
0	0	0	0	0	0	1	71	6	62	0
0	0	0	0	0	0	1	69	10	83	0
0	0	0	0	0	0	1	72	1	9	0
0	0	0	0	0	0	1	77.1342	1	31	1
0	0	0	0	0	0	1	86.189	1	29	1
0	0	0	0	0	0	1	50.2493	30	7	0
1	0	0	0	0	0	1	83	7	54	0
0	0	0	0	0	0	2	73.137	1	2	1
0	0	0	0	0	0	2	77	1	28	0
0	0	0	0	0	0	1	89	1	19	0
0	0	0	0	0	0	1	77.2822	1	31	1
0	0	0	0	0	0	1	59	1	85	0
0	0	0	0	0	0	1	74.3096	1	16	1
0	0	0	0	0	0	1	85	7	13	0
0	0	0	0	0	0	2	65.389	8	11	0
0	0	0	0	0	0	2	57.2795	1	63	1
1	0	0	0	0	0	1	85	1	28	0
0	0	0	0	0	0	1	80	1	68	1
0	0	0	0	0	0	1	76.2356	1	29	0
0	0	0	0	0	1	1	65	2	51	0
0	0	0	0	0	0	2	84.2466	1	39	1
0	0	0	0	0	0	1	65	2	50	0
0	0	0	0	0	0	2	57.5452	1	29	1
0	0	0	0	0	0	1	62.0767	1	2	0
0	0	0	0	0	0	2	66.0192	1	3	1
0	0	0	0	0	0	2	77	1	80	1
0	0	0	0	0	0	1	83	12	4	0
0	0	0	0	0	0	1	79	5	28	0
0	0	0	0	0	0	2	61.4	2	3	0
0	0	0	0	0	0	1	62.1205	1	49	1
0	0	0	0	0	0	1	73.4575	1	40	0
0	0	0	0	0	0	2	48.9644	7	67	0
0	0	0	0	0	0	1	67	1	16	0
0	0	0	0	0	0	1	65.7233	1	69	1
0	0	0	0	0	0	1	46.6219	5	8	0
0	0	0	0	0	0	2	87	1	8	1
0	0	0	0	0	0	1	62.1534	1	32	1
0	1	0	0	0	0	1	48	1	56	1
0	0	0	0	0	0	1	67.6575	1	16	1
1	0	0	0	0	1	2	87.9205	5	26	1
0	0	0	0	0	0	2	70	2	32	0
0	0	0	0	0	0	2	69.9452	2	28	0
0	0	0	0	0	0	2	49	1	1	0
0	0	0	0	0	0	1	67	3	8	0
0	0	0	0	0	0	1	75	3	31	0
0	0	0	0	0	0	1	68.1781	6	16	0
0	0	0	0	0	0	1	65	3	52	0
0	0	0	0	0	0	1	83.6219	1	39	1
0	0	0	0	0	0	2	85.0685	1	3	1
0	0	0	0	0	0	1	74	1	3	0
0	0	0	0	0	0	1	71.9699	1	14	1
1	0	0	0	0	0	1	81	1	58	0
0	0	0	0	0	0	1	77	1	33	0
0	0	0	0	0	0	2	72.5833	1	26	0
0	0	0	0	0	0	1	75.4932	1	73	1
0	0	0	0	0	0	1	74.9616	8	32	0
1	0	0	0	0	0	2	78	1	9	0
0	0	0	0	0	0	1	73.0082	1	27	1
0	0	0	0	0	0	1	71.4082	1	43	1
0	0	0	0	0	0	1	75	4	20	0
0	0	0	0	0	0	1	57.8932	1	38	1
0	0	0	0	0	0	2	79.3123	1	1	1
0	0	0	0	0	0	1	86.9178	1	30	1
0	0	0	0	0	0	2	78.5151	1	43	1
0	0	0	0	0	0	1	62.0833	1	43	1
0	0	0	0	0	0	1	81	1	20	0
0	0	0	0	0	0	1	54.137	1	15	1
0	0	0	0	0	0	2	67.3178	1	65	1
0	0	0	0	0	0	2	78.7753	1	14	1
0	0	0	0	0	0	1	82	4	8	0
0	0	0	0	0	0	2	79.7973	1	58	1
0	0	0	0	0	0	1	80	1	26	1
0	0	0	0	0	0	1	81	4	10	1
0	0	0	0	0	0	2	74.2658	1	12	1
0	0	0	0	0	0	1	79	8	35	0
0	0	0	0	0	0	1	45.0493	1	18	0
0	0	0	0	0	0	1	55.0603	1	12	0
0	0	0	0	0	0	2	67.8027	1	34	1
1	1	0	0	0	0	2	70	4	14	0
0	0	0	0	0	0	2	77.0767	1	65	1
0	0	0	0	0	0	2	74.0521	1	20	0
0	0	0	0	0	0	1	54.1644	1	6	1
0	0	0	0	0	0	1	71	10	28	0
0	0	0	0	0	0	1	70	1	13	0
0	0	0	0	0	0	1	65	4	49	0
0	0	0	0	0	0	2	59	1	13	0
0	0	0	0	0	0	1	86.4959	1	34	1
0	0	0	0	0	0	2	77	1	34	1
0	0	0	0	0	0	2	66.0466	1	1	0
0	0	0	0	0	0	1	62.1973	1	42	1
0	0	0	0	0	0	1	75.4877	1	45	1
0	0	0	0	0	0	2	91.4986	1	38	1
0	0	0	0	0	0	1	73	1	80	1
0	0	1	0	1	0	1	79	9	60	1
0	0	0	0	0	0	2	62	7	43	0
0	0	0	0	0	0	2	73.6685	5	14	1
0	0	0	0	0	0	2	88.5699	1	57	0
0	0	0	0	0	0	2	56.6329	1	72	1
0	0	0	0	0	0	1	72	1	26	1
0	0	0	0	0	0	2	52	1	3	0
0	0	0	0	0	0	1	71	1	17	1
0	0	0	0	0	0	1	84	1	59	1
0	0	0	0	0	0	1	61.2904	1	13	1
0	0	0	0	0	0	2	66	7	20	0
0	0	0	0	1	0	1	67	3	4	0
0	0	0	0	0	0	1	54.0384	2	39	0
0	0	0	0	0	0	1	46	1	61	0
1	0	0	0	0	0	1	34.9808	7	11	1
0	0	0	0	0	0	1	48.0466	1	32	1
0	0	0	0	0	0	2	61.0795	1	20	1
0	0	0	0	0	0	2	66.6667	1	36	1
0	0	0	0	0	0	2	23.3945	1	4	1
0	0	0	0	0	0	2	49	2	10	0
0	0	0	0	0	0	1	63.863	5	19	0
0	0	0	0	0	0	2	81.3342	1	38	1
0	0	0	0	0	0	2	56	10	45	0
0	0	0	0	0	0	2	85	1	47	0
0	0	0	0	0	0	1	51.6667	3	10	1
0	0	0	0	0	0	2	53.5	1	29	1
0	0	0	0	0	0	2	82.126	1	83	1
0	0	0	0	0	0	2	55.2219	1	69	1
0	0	0	0	0	0	1	82	3	12	0
0	0	0	0	0	0	1	62.2521	1	80	1
0	0	0	0	0	0	1	54.926	1	64	1
0	0	0	0	0	0	2	45.4822	1	29	1
0	0	0	0	0	0	1	78	7	70	0
0	0	0	0	0	0	2	76.1562	1	45	1
0	0	0	0	0	0	1	69	9	14	0
0	0	0	0	0	0	1	59.9167	1	45	1
0	0	0	0	0	0	1	52.3534	2	20	0
1	0	0	0	0	0	2	76.7589	7	33	0
0	0	0	0	0	0	1	79	1	20	1
0	0	0	0	0	0	1	75	1	10	1
0	0	0	0	0	0	1	72.0986	1	48	0
0	0	0	0	0	0	1	69	3	48	1
0	0	0	0	0	0	1	61	1	32	0
0	0	0	0	0	0	1	56.189	2	21	0
0	0	0	0	0	0	1	63.5479	1	54	1
0	0	0	0	0	0	1	69	1	4	0
0	0	0	0	0	0	1	87.2082	1	31	0
0	0	0	0	0	0	1	68.2329	1	12	1
0	0	0	0	0	0	2	67.0466	1	56	0
1	0	0	0	0	0	1	71	4	31	0
0	0	0	0	0	0	1	48	2	31	0
0	0	0	0	0	0	1	62.7342	1	16	1
0	0	0	0	0	0	1	71	14	88	0
0	0	0	0	0	0	1	74	5	46	1
0	0	0	0	0	0	2	81	15	54	0
0	0	0	0	0	0	2	50.75	1	53	1
0	0	0	0	0	0	2	78.8333	1	76	1
0	0	0	0	0	0	1	86	1	53	1
0	0	0	0	0	0	2	75.5233	1	37	1
0	0	0	0	0	0	1	63	2	1	0
0	0	0	0	0	0	1	80	5	41	0
0	0	0	0	0	0	1	74.0356	1	6	1
0	0	0	0	0	0	1	68.6712	7	72	0
0	0	0	0	0	0	2	55.0411	1	50	1
0	0	0	0	0	0	2	66.4822	1	23	1
1	0	0	0	0	0	1	76	3	46	0
0	0	0	0	0	0	2	78.4849	14	4	0
0	0	0	0	0	0	2	91	7	40	0
0	0	0	0	0	0	1	70.3753	1	2	1
0	0	0	0	0	0	1	69.1151	1	41	0
0	0	0	0	0	0	2	56.0384	1	63	0
0	0	0	0	0	0	1	65	6	28	0
0	0	0	0	0	0	1	73	1	28	1
0	0	0	0	0	0	1	60	1	70	0
0	0	0	0	0	0	1	67	3	13	0
0	0	0	0	0	0	2	62.2685	1	83	0
0	0	0	0	0	0	1	58.8	1	22	1
0	0	0	0	0	0	1	75.8333	1	68	1
0	0	0	0	0	0	2	77.7863	1	24	1
0	0	0	0	0	0	1	81.5233	1	16	1
0	0	0	0	0	0	1	75	1	1	0
0	0	0	0	0	0	2	57.8082	1	37	1
0	0	0	0	0	0	2	58.2795	1	1	0
0	0	0	0	0	0	2	64.9151	1	83	1
1	0	0	0	0	0	1	67.0466	1	79	0
0	0	0	0	0	0	1	59.011	3	15	0
0	0	0	0	0	0	1	72.0833	3	8	0
0	0	0	0	0	0	1	63	3	28	0
0	0	0	0	0	0	1	79.9644	1	77	1
0	0	0	0	0	0	1	89	1	13	0
0	0	0	0	0	0	1	73.0466	1	59	1
0	0	0	0	0	0	2	63	1	85	1
0	0	0	0	0	0	1	55.1205	1	9	1
0	0	0	0	0	0	1	64.0274	3	25	0
0	0	0	0	0	0	1	66.4493	1	72	1
0	0	0	0	0	0	2	63.8192	1	26	0
0	0	0	0	0	0	2	62.9123	1	20	1
0	0	0	0	0	0	1	67.7562	1	26	0
0	0	0	0	0	0	2	80.9041	1	38	1
0	0	0	0	0	0	1	83	1	11	0
0	0	0	0	0	0	2	63	1	16	1
0	0	0	0	0	0	1	61	1	58	0
0	0	0	0	0	0	1	86	1	85	0
0	0	0	0	0	0	2	66.7479	2	5	1
0	0	0	0	0	0	1	60	1	32	0
0	0	0	0	0	0	1	82	4	69	0
0	0	0	0	0	0	2	67	1	19	1
0	0	0	0	0	0	1	71.3562	3	7	1
1	0	0	0	0	0	1	38	1	6	0
0	0	0	0	0	0	1	76.2493	13	39	1

## Sheet: Table S5
Supplemental Table S5. XGBoost testing dataset for early fatality risk stratification in osimertinib-associated adverse-event reports.
ILD	RF	SEP	PA	DIC	BPD	GENDER	AGE	rank_DRUGNAME	TIME	RESULT
0	0	0	0	0	0	1	77.1096	3	70	0
0	0	0	0	0	0	2	67.5833	7	29	0
0	0	0	0	0	0	1	78.4521	1	27	0
1	0	0	0	0	0	2	71	10	61	1
0	0	0	0	0	0	1	77	1	10	0
0	0	0	0	0	0	1	67.9808	5	6	0
0	0	0	0	0	0	1	80	4	11	0
0	0	0	0	0	0	1	72	1	16	0
0	0	0	0	0	0	1	74	1	53	1
0	0	0	0	0	0	1	68	5	62	0
0	0	0	0	0	0	1	29	3	20	1
0	0	1	0	0	0	2	79	17	70	1
0	0	0	0	0	0	1	61.6411	4	11	0
0	0	0	0	0	0	2	83.2685	1	54	0
1	0	0	0	0	0	1	78	5	34	0
0	0	0	0	0	0	2	81	4	2	0
0	0	0	0	0	0	2	76	7	59	0
0	0	0	0	0	0	1	66.5781	4	28	1
0	0	0	0	0	0	2	67	7	49	0
0	0	0	0	0	0	1	89	1	45	0
0	0	0	0	0	0	2	71	1	34	0
0	0	0	0	0	0	1	72.7096	5	12	0
0	0	0	0	0	0	1	59.4192	1	25	1
0	0	0	0	0	0	1	49.1014	1	36	1
0	0	0	0	0	0	2	61	14	7	1
0	0	0	0	0	0	1	80	1	12	0
1	1	0	0	0	0	1	65.0685	1	64	0
0	0	0	0	0	0	2	60.4329	1	52	1
0	0	0	0	0	0	1	82.5699	8	16	0
0	0	0	0	0	0	1	69.6712	2	65	0
0	0	0	0	0	0	2	80	1	82	1
0	0	0	0	0	0	1	57.2904	1	2	0
0	0	0	0	0	0	1	60	1	46	1
0	0	0	0	0	0	2	53	1	9	0
0	0	0	0	0	0	1	80	1	42	0
0	0	0	0	0	0	2	64.9507	1	25	1
0	0	0	0	0	0	1	70.7014	7	49	1
0	0	0	0	0	0	2	87.2548	1	54	1
1	0	0	0	0	0	1	80	1	55	0
0	0	0	0	0	0	1	81	31	6	1
0	0	0	0	0	0	2	69.4438	1	38	1
0	0	0	0	0	0	2	51.0274	1	11	1
0	0	0	0	0	0	2	78	12	28	0
0	0	0	0	0	0	1	80.4548	1	67	1
0	0	0	0	0	0	2	54.6685	1	2	1
0	0	0	0	0	0	1	61.9836	1	30	1
0	0	0	0	0	0	2	80.1644	1	55	1
0	0	0	0	0	0	1	73.8466	1	42	1
0	0	0	0	0	0	2	80.4167	8	31	1
1	0	0	0	0	0	1	82	4	4	1
0	0	0	0	0	0	1	75	1	8	0
0	0	0	0	0	0	1	68.8301	1	49	0
1	0	0	0	0	0	2	83	1	2	0
0	0	0	0	0	0	2	66.5833	1	55	1
0	0	0	0	0	0	2	48	2	14	0
1	1	0	0	0	0	1	82	2	62	1
0	0	0	0	0	0	2	72.3333	6	15	0
0	0	0	0	0	0	2	79.8333	5	13	1
0	0	0	0	0	0	1	55.0959	1	43	1
0	0	0	0	0	0	2	57	5	40	0
0	0	0	0	0	0	1	71	1	9	1
0	0	0	0	0	0	1	60.0833	2	30	0
0	0	0	0	0	0	1	79.2767	1	26	1
0	0	0	0	0	0	1	54.6932	6	59	1
0	0	0	0	0	0	1	32.2767	1	16	1
0	0	1	0	0	0	1	79.5096	3	13	0
0	0	0	0	0	0	1	79.5836	1	40	0
0	0	0	0	0	0	1	73.1288	5	47	0
0	0	0	0	0	0	1	73	1	1	0
0	0	0	0	0	0	1	65.0575	1	19	1
0	0	0	0	0	0	2	68.2986	1	24	1
0	0	0	0	0	0	2	53.8219	1	79	1
1	0	0	0	0	0	2	77	9	16	1
0	0	0	0	0	0	2	73.6493	1	27	1
0	0	0	0	0	0	2	82.7644	1	68	1
0	0	0	0	0	0	1	62.5562	1	43	1
0	0	0	0	0	0	2	70.074	1	6	1
0	0	0	0	0	0	1	71	14	2	1
0	0	0	0	0	0	2	70	3	15	1
1	0	0	0	1	0	1	73	1	23	1
0	0	0	0	0	0	2	78	7	27	1
0	0	0	0	0	0	1	59.9233	1	24	1
0	0	0	0	0	0	2	73	1	23	0
0	0	0	0	0	0	1	54.2164	1	3	1
0	0	0	0	0	0	2	44.0986	1	58	1
0	0	0	0	0	0	2	51.6137	1	89	1
0	0	0	0	0	0	1	81	4	7	0
0	0	0	0	0	0	1	75.2301	1	65	1
0	0	0	0	0	0	2	70	2	4	0
0	0	0	0	0	0	2	46.6027	1	13	1
0	0	0	0	0	0	2	53	3	11	0
0	0	0	0	0	0	2	65.1178	1	35	1
0	0	0	0	0	0	1	75	8	37	0
0	0	0	0	0	0	2	57.7178	1	44	1
0	0	0	0	0	0	1	81	9	10	0
0	0	0	0	0	0	1	69.4274	1	1	0
0	0	0	0	0	0	1	69	1	24	0
0	0	0	0	0	0	2	73.1041	1	53	1
0	0	0	0	0	0	1	74.9479	1	28	1
0	0	0	0	0	0	2	82.2521	1	83	1
0	0	0	0	0	0	1	75	1	31	0
0	0	0	0	0	0	1	71	2	71	0
1	0	0	0	0	0	1	82	3	11	0
0	0	0	0	0	0	1	86	2	47	0
0	0	0	0	0	0	1	24.0301	1	31	1
0	0	0	0	0	0	2	87.7479	1	34	1
0	0	0	0	0	0	1	69	4	37	0
0	0	0	0	0	0	1	54.7315	1	26	1
0	0	0	0	0	0	1	81.4438	1	10	1
0	0	0	0	0	0	1	60.8164	1	2	1
0	0	0	0	0	0	1	72	6	71	1
0	0	0	0	0	0	2	74.9945	18	71	1
0	0	0	0	0	0	2	69.7534	1	86	1
0	0	0	0	0	0	2	24.0904	1	40	1
0	0	0	0	0	0	1	74	4	55	0
0	0	0	0	0	0	1	60	2	73	1
1	0	0	0	0	0	2	76	8	14	1
0	0	0	0	0	0	1	70	9	76	0
0	0	0	0	0	0	2	56.4877	1	12	1
0	0	0	0	0	0	1	82	7	73	0
0	0	0	0	0	0	2	75.2712	1	22	1
0	0	0	0	0	0	1	89.0575	1	17	1
0	0	0	0	0	0	2	58	4	1	0
0	0	0	0	0	0	1	64.9699	2	14	0
0	0	0	0	0	0	2	59	1	70	0
0	0	0	0	0	0	2	64.0603	1	47	1
0	0	0	0	0	0	2	55.8	1	12	1
0	0	0	0	0	0	1	76	3	26	0
0	0	0	0	0	0	1	78	1	22	0
0	0	0	0	0	0	1	70	1	47	1
0	0	0	0	0	0	1	74.3781	1	80	1
0	0	0	0	0	0	1	88	1	12	0
1	0	0	0	0	0	1	82	7	1	0
1	0	0	0	0	0	1	72	8	27	1
0	0	0	0	0	0	1	80.2329	1	69	1
0	0	0	0	0	0	2	69.1068	2	50	0
0	0	0	0	0	0	1	70	3	1	0
1	1	0	0	0	0	2	79	7	57	0
0	0	0	0	0	0	1	93	5	89	0
0	0	0	0	0	0	2	62.4685	1	90	1
0	0	0	0	0	0	2	71.1836	1	20	1
0	0	0	0	0	0	1	78.4384	1	34	1
0	0	0	0	0	0	2	77	1	15	0
0	0	0	0	0	0	1	41.3452	1	84	1
0	0	0	0	0	0	1	66.211	1	58	1
0	0	0	0	0	0	1	90	2	6	0
0	0	0	0	0	0	1	69	10	39	0
1	1	0	0	0	0	2	72	1	80	1
0	0	0	0	0	0	1	65	13	44	1
0	0	0	0	0	0	1	45.3534	1	9	1
0	0	0	0	0	0	1	87.7205	12	36	0
0	0	0	0	0	0	2	71	1	81	0
0	0	0	0	0	0	2	75	1	9	0
0	0	0	0	0	0	1	60	8	3	0
0	0	0	0	0	0	1	77	11	26	1
0	0	0	0	0	0	1	68.1534	3	80	0
0	0	0	0	0	0	1	59.3178	1	15	0
0	0	0	0	0	0	1	83	1	32	0
0	0	0	0	0	0	2	57.4658	1	18	0
0	0	0	0	0	0	1	77.0959	3	70	0
0	0	0	0	0	0	2	53.2411	1	39	1
0	0	0	0	0	0	1	89.6712	1	87	0
0	0	0	0	0	0	2	66	2	42	0
0	0	0	0	0	0	1	80	1	5	0
0	0	0	0	0	0	2	51.8	1	11	1
0	0	0	0	0	0	1	82	4	19	0
0	0	0	0	0	0	2	50.2877	1	62	1
0	0	0	0	0	0	2	70.9918	3	87	1
0	0	0	0	0	0	1	76	1	27	0
0	0	0	0	0	0	2	55	1	89	0
0	0	0	0	0	0	1	44	1	9	0
1	0	0	0	0	0	1	80	3	57	0
0	0	0	0	0	0	2	67.9534	1	79	0
0	0	0	0	0	0	1	52.737	1	5	0
0	0	0	0	0	0	2	75	7	62	0
0	0	0	0	0	0	2	47.1945	1	52	1
0	0	0	0	0	0	1	77	1	10	0
0	0	0	0	0	0	1	68	5	27	0
0	0	0	0	0	0	1	86	6	7	1
0	0	0	0	0	0	1	71	12	24	0
0	0	0	0	0	0	1	55.5644	1	82	0
0	0	0	0	0	0	1	38.8333	2	25	0
0	0	0	0	0	0	1	61.4137	1	89	0
0	0	0	0	0	0	1	43	4	2	0
0	0	0	0	0	0	1	78.9178	1	17	0
0	0	0	0	0	0	1	75	6	49	0
0	0	0	0	0	0	2	68	1	36	0
0	0	0	0	0	0	1	62.25	2	59	0
0	0	0	0	0	0	1	65.9863	4	6	0
0	0	0	0	0	0	1	80	1	6	0
0	0	0	0	0	0	1	83	1	8	0
0	0	0	0	0	0	2	71.9452	1	14	0
0	0	0	0	0	0	2	49.3333	2	55	0
0	0	0	0	0	0	1	64.9808	1	85	1
0	0	0	0	0	0	1	73.5452	4	3	0
0	0	0	0	0	0	2	42.9014	1	1	0
0	0	0	0	0	0	2	70	4	11	0
0	0	0	0	0	0	1	85.3333	1	27	0
0	0	0	0	0	0	1	69.0833	1	67	0
0	0	0	0	0	0	2	64.5973	1	19	0
0	0	0	0	0	0	1	63	5	61	0
0	0	0	0	0	0	1	57	2	14	0
0	0	0	0	0	0	1	64	1	44	0
0	0	0	0	0	0	2	83	1	16	0
0	0	0	0	0	0	2	68	3	14	1
0	0	0	0	0	0	1	74	1	18	0
0	0	0	0	0	0	1	55	3	70	0
0	0	0	0	0	0	1	93	1	12	0
0	0	0	0	0	0	1	84.2411	4	31	0
1	1	0	0	0	0	1	74	5	77	1
0	0	0	0	0	0	1	62	4	26	0
0	0	0	0	0	0	1	62	4	22	0
1	0	0	0	0	0	1	82	4	14	1
0	0	0	0	0	0	2	74	1	15	0
0	0	0	0	0	0	2	67	2	8	0
0	0	0	0	0	0	1	76	3	18	0
0	0	0	0	0	0	1	65	1	4	0
0	0	0	0	0	0	1	61	1	9	1
0	0	0	0	0	0	2	65	1	32	0
0	0	0	0	0	0	2	82	3	15	0
0	0	0	0	0	0	2	63	2	20	0
0	0	0	0	0	0	1	76	2	35	0
0	0	0	0	0	0	1	58	3	21	0
0	0	0	0	0	0	1	56	6	5	0
0	0	0	0	0	0	1	63	1	17	1
0	0	0	0	0	0	1	51	4	72	0
0	0	0	0	0	0	2	71	1	51	0
0	0	0	0	0	0	1	46	12	16	0
0	0	0	0	0	0	2	54	5	1	0
0	0	0	0	0	0	1	82	4	2	0
0	0	0	0	0	0	1	73	3	30	0
0	0	0	0	0	0	2	70	1	6	1
0	0	0	0	0	0	1	65	5	11	0
0	0	0	0	0	0	1	88	11	20	1
0	0	0	0	0	0	1	67	3	13	0
0	0	0	0	0	0	2	57	2	63	0
0	0	0	0	0	0	1	88	4	11	0
0	0	0	0	0	0	1	75	1	49	1
0	0	0	0	0	0	1	80	5	26	1
0	0	0	0	0	0	2	91	1	4	0
1	0	0	0	0	0	1	50	12	33	0
0	0	0	0	0	0	1	75	3	44	0
0	0	0	0	0	0	1	74	7	15	0
1	1	0	0	0	0	2	82	1	30	1
0	0	0	0	0	0	2	45	8	23	0
0	0	0	0	0	0	2	72	5	8	0
0	0	0	0	0	0	1	74	1	5	0
0	0	0	0	0	0	1	72	1	37	1
0	0	0	0	0	0	1	64	3	19	1
0	0	0	0	0	0	1	36	13	20	0
0	0	0	0	0	0	2	69	1	15	1
0	0	0	0	0	0	2	74	1	1	0
0	0	0	0	0	0	1	64	5	44	0
0	0	0	0	0	0	2	49	1	8	0
0	0	0	0	0	0	2	60	4	8	0
0	0	0	0	0	0	1	80	4	11	0
1	0	0	0	0	0	2	75	3	34	0
0	0	0	0	0	0	1	38	1	68	0
0	0	0	0	0	0	1	79	14	7	0
0	0	0	0	0	0	1	71	3	23	0
0	0	0	0	0	0	1	68	1	10	0
0	0	0	0	0	0	2	60	1	39	0
0	0	0	0	0	0	2	52	14	44	0
0	0	0	0	0	0	2	43	1	9	1
1	0	0	0	0	0	2	82	3	47	0
0	0	0	0	0	0	1	79	1	17	0
0	0	0	0	0	0	2	60	1	47	0
0	0	0	0	0	0	1	56	1	14	0
0	0	0	0	0	0	1	56	2	38	0
0	0	0	0	0	0	1	79	1	18	0
0	0	0	0	0	0	1	53	1	66	0
0	0	0	0	0	0	2	85	1	9	0
0	0	0	0	0	0	2	60	5	39	0
0	0	0	0	0	0	2	76	1	4	1
1	0	0	0	0	0	2	68	11	49	0
0	0	0	0	0	0	2	89	1	2	0
0	0	0	0	0	0	1	45	1	9	0
0	0	0	0	0	0	1	68	5	10	0
0	0	0	0	0	0	2	41	1	12	0
0	0	0	0	0	0	1	71	4	22	0
0	0	0	0	0	0	2	54	1	12	0
0	0	0	0	0	0	2	65	3	1	0
0	0	0	0	0	0	2	58	1	14	0
0	0	0	0	0	0	1	58	9	12	0
0	0	0	0	0	0	1	62	3	25	0
0	0	0	0	0	0	1	59	5	51	0
0	0	0	0	0	0	2	69	1	21	0
0	0	0	0	0	0	1	72	2	1	0
0	0	0	0	0	0	2	80	1	2	0
0	0	0	0	0	0	2	51	1	63	0
0	0	0	0	0	0	1	60	3	9	0
0	0	0	0	0	0	1	85	1	23	0
0	0	0	0	0	0	2	83	1	15	0
0	0	0	0	0	0	1	72	13	10	0
0	0	0	0	0	0	2	82	1	23	0
0	0	0	0	0	0	1	71	3	7	0
0	0	0	0	0	0	1	84	1	15	0
0	0	0	0	0	0	2	73	1	54	0
0	0	0	0	0	0	1	49	1	30	0
0	0	0	0	0	0	1	74	1	4	0
0	0	0	0	0	0	1	64	1	7	0
0	0	0	0	0	0	1	76	1	9	0
0	0	0	0	0	0	1	60	1	51	0
0	0	0	0	0	0	2	72	3	5	0
0	0	0	0	0	0	1	36	7	43	0
0	0	0	0	0	0	1	90	3	22	0
0	0	0	0	0	0	2	63	5	2	0
0	0	0	0	0	0	2	66	7	12	0
0	0	0	0	0	0	2	63	3	22	0
0	0	0	0	0	0	2	86	1	1	0
0	0	0	0	0	0	1	76	1	9	0
0	0	0	0	0	0	2	79	2	33	1
0	0	0	0	0	0	2	69	3	29	0
0	0	0	0	0	0	1	46	1	2	0
0	0	0	0	0	0	1	53	2	2	0
0	0	0	0	0	0	2	69	1	14	0
0	0	0	0	0	0	2	80	1	1	0
0	0	0	0	0	0	1	61	5	11	0
0	0	0	0	0	0	1	67	1	76	0
0	0	0	0	0	0	2	59	10	58	0
0	0	0	0	0	0	1	57	1	1	1
0	0	0	0	0	0	2	81	2	33	0
0	0	0	0	0	0	1	89	1	24	0
0	0	0	0	0	0	2	56	1	7	0
0	0	0	0	0	0	1	69	1	19	0
0	0	0	0	0	0	1	65	4	24	0
0	0	0	0	0	0	2	75	1	7	0
0	0	0	0	0	0	1	69	1	72	0
0	0	0	0	0	0	1	57	1	87	0
0	0	0	0	0	0	1	69	1	80	1
1	0	0	0	0	0	1	77	1	34	1
0	0	0	0	0	0	2	62	2	3	0
0	0	0	0	0	0	2	76	1	28	0
0	0	0	0	0	0	2	65	2	7	0

## Sheet: Table S6
Supplemental Table S6. Hyperparameters for the XGBoost model. Fold 'holdout' indicates the hyperparameters trained on all 2016-2022 data and tested in the later-period temporal holdout cohort (2023-2025).
Drug	nrounds	max_depth	eta	gamma	colsample_bytree	min_child_weight	subsample	fold
Osimertinib_NSCLC	3	3	0.1	0.5	0.9	1	0.8	1
Osimertinib_NSCLC	3	3	0.1	0.5	0.9	1	0.8	2
Osimertinib_NSCLC	3	3	0.1	0.5	0.9	1	0.8	3
Osimertinib_NSCLC	3	3	0.1	0.5	0.9	1	0.8	4
Osimertinib_NSCLC	3	3	0.1	0.5	0.9	1	0.8	5
Osimertinib_NSCLC	3	3	0.1	0.5	0.9	1	0.8	holdout

## Sheet: Table S7
Supplemental Table S7. Hyperparameters for the random forest model. Fold 'holdout' indicates the hyperparameters trained on all development data and tested in the later-period temporal holdout cohort.
Drug	ntree	mtry	maxnodes	nsplit	fold
Osimertinib_NSCLC	500	3	NA	NA	1
Osimertinib_NSCLC	500	3	NA	NA	2
Osimertinib_NSCLC	500	3	NA	NA	3
Osimertinib_NSCLC	500	3	NA	NA	4
Osimertinib_NSCLC	500	3	NA	NA	5
Osimertinib_NSCLC	500	3	NA	NA	holdout
